# Supplementary material for: Biomass distribution pattern and stoichiometric characteristics in main shrub ecosystems in Central Yunnan, China
Source: PeerJ. 2022 Feb 28;10:e13005. doi: 10.7717/peerj.13005 (PMC8893025; doi:10.7717/peerj.13005)
Supplement: Supplemental Information 1 — Carbon content of main shrub biosphere in Central Yunnan, Carbon density and distribution pattern of components in main shrub ecosystems in Central Yunnan (mean ± standard deviation), Community level biomass and fitting, and Species biomass and fitting SPSS analysis [file peerj-10-13005-s001.xls]

## Sheet: Biomass of main shrub communiti
Sample plot	Shrub layer			Herb layer		Litter layer	Biological layer
	Root	Stem	Leaf	Under-ground	above-ground
Q1	0.70±10.38	0.65±7.97	0.50±6.91	0.60±5.60	0.53±4.66	0.01±0.55	2.99±6.01
Q2	0.62±11.81	0.64±5.22	0.49±3.01	/	/	0.01±0.27	1.76±3.39
Q3	0.68±11.90	0.65±3.70	0.65±16.57	0.68±1.24	0.64±10.40	0.01±0.10	3.30±7.32
Q4	0.61±6.78	0.61±8.03	0.52±5.99	0.62±0.00	0.57±0.00	0.01±0.15	2.94±3.49
Q5	0.63±8.35	0.63±8.35	0.56±3.93	0.14±0.00	0.81±0.00	0.02±1.03	2.80±3.61
Q6	0.66±7.52	0.62±3.95	0.51±2.29	0.14±0.00	0.12±0.00	0.01±0.18	2.06±2.32
Q7	0.75±4.51	0.69±5.72	0.45±3.18	0.62±11.30	0.49±8.67	0.01±0.08	3.00±5.58
Q8	0.62±2.94	0.58±9.38	0.52±4.54	0.55±13.77	0.44±10.54	0.02±0.67	2.72±6.97
Q9	0.56±4.21	0.56±2.84	0.54±2.81	0.56±0.00	0.58±0.00	0.01±0.35	2.81±1.70
Q10	0.57±5.12	0.57±28.29	0.54±2.69	0.51±3.95	0.55±16.50	0.01±0.10	2.74±9.44
Q11	0.76±6.20	0.78±3.24	0.69±3.98	0.51±1.97	0.39±11.71	0.01±0.04	3.14±4.52
Q12	0.62±2.79	0.64±4.72	0.56±8.73	0.59±6.45	0.52±1.65	0.01±0.10	2.94±4.07
Q13	0.78±7.31	0.77±4.56	0.54±2.91	0.61±9.81	0.42±5.95	0.01±0.12	3.13±5.11
Q14	0.71±3.23	0.76±17.28	0.52±3.47	0.59±5.68	0.40±9.40	0.01±0.05	2.970±6.52
Q15	0.60±4.06	0.68±8.26	0.52±8.12	0.42±1.10	0.21±3.21	0.02±0.21	2.44±4.16
Q16	0.61±5.87	0.69±6.39	0.47±1.97	0.38±15.32	0.39±3.58	0.02±0.26	2.55±5.57
Q17	0.70±5.45	0.80±6.13	0.66±0.97	0.54±9.10	0.49±6.83	0.02±0.33	3.22±4.80
Q18	0.62±0.77	0.65±1.31	0.57±5.54	0.42±11.38	0.33±7.65	0.03±0.23	2.63±4.48
Q19	0.55±5.49	0.65±2.26	0.34±2.69	0.62±7.32	0.43±3.54	0.04±0.13	2.62±3.57
Q20	0.71±6.21	0.75±5.50	0.78±4.65	0.50±6.07	0.51±6.45	0.03±0.12	3.28±4.83
Q21	0.65±8.66	0.75±6.07	0.56±6.64	0.37±6.21	0.30±6.94	0.03±0.06	2.67±5.76
Q22	0.75±6.63	0.83±2.26	0.54±8.17	0.63±6.40	0.43±12.33	0.03±0.05	3.20±5.97
Q23	0.79±2.73	0.66±3.59	0.60±13.82	0.70±1.79	0.62±6.75	0.03±0.07	3.40±4.79
