# Supplementary material for: Biomass distribution pattern and stoichiometric characteristics in main shrub ecosystems in Central Yunnan, China
Source: PeerJ. 2022 Feb 28;10:e13005. doi: 10.7717/peerj.13005 (PMC8893025; doi:10.7717/peerj.13005)
Supplement: Supplemental Information 2 [file peerj-10-13005-s002.xlsx]

## Sheet: sample plot
Sample plot
Plot number	Formation	Survey location	latitude	longitude	altitude	Slope direction	slope	Shrub origin	Slope position	Shrub layer height	Shrub layer coverage	Herb layer height	herb coverage
YN001	Myrsine africana Linn.	Yao'an	25.4935	101.228	1972.4	34	46.6667	Secondary	Middle upper part	0.7	80	0.25	12
YN002	Myrica nana A. Cheval.	Yao'an	25.5224	101.398	2220.6	29	15.3333	Secondary	top	0.85	43	0.08	12
YN005	Quercus pseudosemecarpifolia A. Camus	Yao'an	25.3743	101.214	2208.6	96	15.3333	Secondary	top	1.4	65	0.17	4
YN009	Phyllanthus emblica Linn.	Dayao	25.8551	101.522	1562.6	120	26	Secondary	Middle lower part	2.5	46	0.38	11
YN011	Myrica nana A. Cheval.	Dayao	25.914	101.235	2396	95	8.33333	Primordial	Middle upper part	1.47	76	0.14	4
YN012	Rhododendron adenogynum Diels	Dayao	26.0927	101.238	2597.9	283	9	Secondary	Middle upper part	1.45	67	0.18	6
YN015	Phyllanthus emblica Linn.	Mouding	25.5543	101.629	1761.2	257	26.6667	Secondary	Central section	1.76	84	0.36	9
YN016	Myrica nana A. Cheval.	Mouding	25.4365	101.526	2145.2	93	33.6667	Secondary	Middle upper part	0.8	50	0.13	40
YN018	Myrica nana A. Cheval.	Nanhua	25.3257	101.028	2567.2	168	7.66667	Secondary	top	0.82	68	0.33	4
YN022	Myrica nana A. Cheval.	Lufeng	25.306	102.125	2113.1	218	2.66667	Secondary	top	1.27	43	0.25	5
YN023	Phyllanthus emblica Linn.	Lufeng	25.2515	102.085	1817.5	109	9.33333	Secondary	Middle upper part	1.78	84	0.52	3
YN026	Myrica nana A. Cheval.	Anning	24.8574	102.453	2043.8	157	6.33333	Secondary	Middle upper part	0.96	92	0.16	8
YN039	Myrica nana A. Cheval.	Fumin	25.2333	102.419	2086	310	8.33333	Secondary	Central section	0.48	75	0.12	35
YN041	Myrica nana A. Cheval.	Xundian	25.5428	103.389	2060.9	268	12	Primordial	Middle upper part	0.84	72	0.09	74
YN042	Quercus fabri Hance	Xundian	25.4678	103.239	1968.6	172	3.66667	Secondary	Middle upper part	2.1	82	0.1	34
YN043	Rhododendron racemosum Franch.	Xundian	25.4664	103.239	1949.03	154	29.6667	Primordial	Middle upper part	1.4	67	0.16	46
YN048	Rhododendron telmateium Balf. F. et W. W. Smith	Huize	26.33	103.239	3190	164	35	Primordial	ridge	0.5	78	0.4	26
YN049	Rhododendron racemosum Franch.	Huize	26.3317	103.232	3130	328	33	Primordial	ridge	0.7	74	0.2	63
YN051	Zanthoxylum planispinum Sieb．Et Zucc	Huize	26.5267	103.456	1935	163	30.6667	Secondary	Central section	3.9	85	0.8	62
YN059	Rhododendron delavayi Franch.	Shizong	24.9061	103.872	2183	114	16.6667	Primordial	Central section	1.8	72	0.4	43
YN061	Pyracantha fortuneana (Maxim.) Li	Shizong	24.6756	104.079	2085	140	14.3333	Secondary	Central section	3.2	73	0.6	51
YN070	Zanthoxylum planispinum Sieb．Et Zucc	Shizong	24.3794	104.268	1319	255	23	Secondary	Middle upper part	2.2	74	0.7	64
YN071	[Loropetalum chinense (R. Br.) Oliver]	Tonghai	23.9625	102.688	1480	96	24.3333	Secondary	Middle upper part	1.4	70	0.7	84

## Sheet: Shrub layer biomass
Shrub layer biomass
Sample code	plot number	harvest area	species	height class	coverage	average height	number of plant clusters	organ	sample dry weight
YN001	1	1	Sophora davidii (Franch.) Skeels	0.5	23	0.4	1	leaf	52.5
YN001	1	1	Sophora davidii (Franch.) Skeels	0.5	23	0.4	1	stem	71.6
YN001	1	1	Sophora davidii (Franch.) Skeels	0.5	23	0.4	1	root	90.2
YN001	3	1	others	0.5	15	0.3	2	leaf	41.7
YN001	2	1	others	0.5	14	0.43	2	leaf	36.6
YN001	2	1	others	0.5	14	0.43	2	stem	63.3
YN001	2	1	others	0.5	14	0.43	2	root	54.9
YN001	3	1	others	0.5	15	0.3	2	stem	66
YN001	3	1	others	0.5	15	0.3	2	root	62.1
YN001	1	1	Pyrus calleryana Decne	0.5	21	0.3	1	leaf	56.3
YN001	2	1	Pyrus calleryana Decne	0.5	27	0.4	1	leaf	48.1
YN001	3	1	Pyrus calleryana Decne	0.5	34	0.6	2	leaf	55.2
YN001	1	1	Pyrus calleryana Decne	0.5	21	0.3	1	stem	60
YN001	2	1	Pyrus calleryana Decne	0.5	27	0.4	1	stem	78.3
YN001	3	1	Pyrus calleryana Decne	0.5	34	0.6	2	stem	65.2
YN001	1	1	Pyrus calleryana Decne	0.5	21	0.3	1	root	65.5
YN001	2	1	Pyrus calleryana Decne	0.5	27	0.4	1	root	72
YN001	3	1	Pyrus calleryana Decne	0.5	34	0.6	2	root	76.1
YN001	1	1	Myrsine africana Linn	0.5	20	0.4	3	leaf	50
YN001	1	1	Myrsine africana Linn	0.5	20	0.4	3	stem	75.3
YN001	1	1	Myrsine africana Linn	0.5	20	0.4	3	root	63.6
YN001	1	1	Myrsine africana Linn	1	22	0.5	4	leaf	61.8
YN001	2	1	Myrsine africana Linn	1	29	0.6	3	leaf	50.3
YN001	3	1	Myrsine africana Linn	1	26	0.55	3	leaf	46.4
YN001	1	1	Myrsine africana Linn	1	22	0.5	4	stem	54.5
YN001	1	1	Myrsine africana Linn	1	22	0.5	4	root	59.9
YN001	2	1	Myrsine africana Linn	1	29	0.6	3	stem	53.3
YN001	3	1	Myrsine africana Linn	1	26	0.55	3	root	79.3
YN001	3	1	Myrsine africana Linn	1	26	0.55	3	stem	59.2
YN001	2	1	Myrsine africana Linn	1	29	0.6	3	root	79.4
YN002	1	1	Myrica nana A. Cheval.	0.5	56	0.4	3	leaf	49.2
YN002	2	1	Myrica nana A. Cheval.	0.5	87	0.45	5	leaf	55.4
YN002	1	1	Myrica nana A. Cheval.	0.5	56	0.4	3	stem	63.3
YN002	1	1	Myrica nana A. Cheval.	0.5	56	0.4	3	root	45.5
YN002	2	1	Myrica nana A. Cheval.	0.5	87	0.45	5	stem	69.2
YN002	2	1	Myrica nana A. Cheval.	0.5	87	0.45	5	root	62.3
YN002	2	1	Rhododendron microphyton Franch	1	42	0.54	1	leaf	48.5
YN002	1	1	Rhododendron microphyton Franch	1	38	0.7	2	leaf	46.5
YN002	2	1	Rhododendron microphyton Franch	1	42	0.54	1	stem	57.8
YN002	2	1	Rhododendron microphyton Franch	1	42	0.54	1	root	72.7
YN002	1	1	Rhododendron microphyton Franch	1	38	0.7	2	stem	57
YN002	1	1	Rhododendron microphyton Franch	1	38	0.7	2	root	71.8
YN002	1	1	Vaccinium bracteatum Thunb.	1	52	0.6	2	leaf	48.4
YN002	1	1	Vaccinium bracteatum Thunb.	1	52	0.6	2	stem	60.1
YN002	1	1	Vaccinium bracteatum Thunb.	1	52	0.6	2	root	72.8
YN002	3	1	Myrica nana A. Cheval.	1.5	89	1.2	3	leaf	45.8
YN002	3	1	Myrica nana A. Cheval.	1.5	89	1.2	3	stem	69.1
YN002	3	1	Myrica nana A. Cheval.	1.5	89	1.2	3	root	56.3
YN002	2	1	Vaccinium bracteatum Thunb.	1.5	76	1.3	1	leaf	51.5
YN002	2	1	Vaccinium bracteatum Thunb.	1.5	76	1.3	1	stem	69.9
YN002	2	1	Vaccinium bracteatum Thunb.	1.5	76	1.3	1	root	74.1
YN002	3	1	Vaccinium bracteatum Thunb.	2	75	1.8	2	root	43.6
YN003	1	1	Gaultheria forrestii	0.5	16	0.45	1	leaf	45
YN003	1	1	Gaultheria forrestii	0.5	16	0.45	1	stem	36.1
YN003	1	1	Gaultheria forrestii	0.5	16	0.45	1	root	74.5
YN003	1	1	Myrica nana A. Cheval.	1	42	0.84	2	leaf	43.3
YN003	3	1	Myrica nana A. Cheval.	1	40	0.78	2	leaf	51.4
YN003	2	1	Myrica nana A. Cheval.	1	41	0.86	3	leaf	46.3
YN003	1	1	Myrica nana A. Cheval.	1	42	0.84	2	stem	69.6
YN003	2	1	Myrica nana A. Cheval.	1	41	0.86	3	stem	53.2
YN003	3	1	Myrica nana A. Cheval.	1	40	0.78	2	stem	61
YN003	1	1	Myrica nana A. Cheval.	1	42	0.84	2	root	92.1
YN003	3	1	Myrica nana A. Cheval.	1	40	0.78	2	root	59.1
YN003	2	1	Myrica nana A. Cheval.	1	41	0.86	3	root	57.9
YN003	2	1	Vaccinium bracteatum Thunb.	1	26	0.95	1	leaf	51
YN003	1	1	Vaccinium bracteatum Thunb.	1	37	0.92	1	leaf	49.3
YN003	2	1	Vaccinium bracteatum Thunb.	1	26	0.95	1	stem	53
YN003	1	1	Vaccinium bracteatum Thunb.	1	37	0.92	1	root	49.5
YN003	2	1	Vaccinium bracteatum Thunb.	1	26	0.95	1	root	56.3
YN003	3	1	Vaccinium bracteatum Thunb.	1	24	0.7	1	leaf	50.3
YN003	1	1	Vaccinium bracteatum Thunb.	1	37	0.92	1	stem	62.6
YN003	3	1	Vaccinium bracteatum Thunb.	1	24	0.7	1	stem	65.5
YN003	3	1	Vaccinium bracteatum Thunb.	1	24	0.7	1	root	84.4
YN003	2	1	Rhododendron microphyton Franch	1.5	19	1.13	1	leaf	49.2
YN003	2	1	Rhododendron microphyton Franch	1.5	19	1.13	1	stem	64.1
YN003	2	1	Rhododendron microphyton Franch	1.5	19	1.13	1	root	71.8
YN003	3	1	Vaccinium bracteatum Thunb.	2	75	1.8	2	leaf	48.3
YN003	3	1	Vaccinium bracteatum Thunb.	2	75	1.8	2	stem	59.3
YN004	1	1	Myrica nana A. Cheval.	0.5	35	0.42	2	leaf	43
YN004	1	1	Myrica nana A. Cheval.	0.5	35	0.42	2	stem	60.8
YN004	1	1	Myrica nana A. Cheval.	0.5	35	0.42	2	root	41.8
YN004	1	1	Rhododendron microphyton Franch	0.5	16	0.75	1	leaf	51.1
YN004	1	1	Rhododendron microphyton Franch	0.5	16	0.75	1	stem	55.8
YN004	1	1	Rhododendron microphyton Franch	0.5	16	0.75	1	root	86.8
YN004	3	1	others	0.5	13	0.25	1	leaf	41.7
YN004	3	1	others	0.5	13	0.25	1	root	57.8
YN004	3	1	others	0.5	13	0.25	1	stem	69.1
YN004	3	1	Myrica nana A. Cheval.	1	48	0.8	2	leaf	53
YN004	2	1	Myrica nana A. Cheval.	1	38	1		leaf	56.4
YN004	3	1	Myrica nana A. Cheval.	1	48	0.8	2	stem	51.6
YN004	2	1	Myrica nana A. Cheval.	1	38	1		stem	56.3
YN004	2	1	Myrica nana A. Cheval.	1	38	1		root	46.6
YN004	3	1	Myrica nana A. Cheval.	1	48	0.8	2	root	64.1
YN004	1	1	Vaccinium fragile Franch.	1	17	0.33	2	leaf	58
YN004	1	1	Vaccinium fragile Franch.	1	17	0.33	2	stem	57.2
YN004	1	1	Vaccinium fragile Franch.	1	17	0.33	2	root	53.1
YN004	3	1	Tripterygium hypoglaucum (Levl.) Hutch	1.5	34	1.07	1	leaf	43.3
YN004	3	1	Tripterygium hypoglaucum (Levl.) Hutch	1.5	34	1.07	1	root	58.6
YN004	3	1	Tripterygium hypoglaucum (Levl.) Hutch	1.5	34	1.07	1	stem	72
YN004	2	1	Vaccinium bracteatum Thunb.	1.5	14	1.13	1	leaf	43
YN004	3	1	Vaccinium bracteatum Thunb.	1.5	16	1.24	1	leaf	52
YN004	3	1	Vaccinium bracteatum Thunb.	1.5	16	1.24	1	stem	50.3
YN004	2	1	Vaccinium bracteatum Thunb.	1.5	14	1.13	1	root	42.5
YN004	3	1	Vaccinium bracteatum Thunb.	1.5	16	1.24	1	root	51.5
YN004	2	1	Vaccinium bracteatum Thunb.	1.5	14	1.13	1	stem	450.3
YN005	3	1	Quercus pseudosemecarpifolia A. Camus	0.5	53	0.82	2	root	51.3
YN005	3	1	Quercus pseudosemecarpifolia A. Camus	0.5	53	0.82	2	leaf	77.2
YN005	3	1	Quercus pseudosemecarpifolia A. Camus	0.5	53	0.82	2	stem	77.4
YN005	1	1	Quercus pseudosemecarpifolia A. Camus	1.5	42	1.25		root	73.1
YN005	2	1	Quercus pseudosemecarpifolia A. Camus	1.5	44	1.18	2	leaf	71.4
YN005	1	1	Quercus pseudosemecarpifolia A. Camus	1.5	42	1.25		leaf	84.1
YN005	2	1	Quercus pseudosemecarpifolia A. Camus	1.5	44	1.18	2	stem	88.5
YN005	1	1	Quercus pseudosemecarpifolia A. Camus	1.5	42	1.25		stem	91.3
YN005	2	1	Quercus pseudosemecarpifolia A. Camus	1.5	44	1.18	2	root	85.3
YN005	2	1	Vaccinium bracteatum Thunb.	1.5	15	1.07	1	leaf	51.3
YN005	2	1	Vaccinium bracteatum Thunb.	1.5	15	1.07	1	stem	66
YN005	2	1	Vaccinium bracteatum Thunb.	1.5	15	1.07	1	root	58.4
YN005	1	1	Vaccinium dunalianum	2	14	1.75		leaf	39.9
YN005	1	1	Vaccinium dunalianum	2	14	1.75		root	71.5
YN005	1	1	Vaccinium dunalianum	2	14	1.75		stem	58.4
YN006	1	1	Myrica nana A. Cheval.	0.5	60	0.7	4	leaf	66.6
YN006	1	1	Myrica nana A. Cheval.	0.5	60	0.7	4	stem	72.9
YN006	3	1	Myrica nana A. Cheval.	0.5	45	0.7	4	leaf	54.4
YN006	2	1	Myrica nana A. Cheval.	0.5	65	0.06	3	leaf	61
YN006	3	1	Myrica nana A. Cheval.	0.5	45	0.7	4	stem	67
YN006	2	1	Myrica nana A. Cheval.	0.5	65	0.06	3	stem	69
YN006	1	1	Myrica nana A. Cheval.	0.5	60	0.7	4	root	63.3
YN006	2	1	Myrica nana A. Cheval.	0.5	65	0.06	3	root	69.9
YN006	3	1	Myrica nana A. Cheval.	0.5	45	0.7	4	root	63.7
YN006	3	1	Quercus guyavifolia	2.5	10	2.1	2	leaf	70.9
YN006	3	1	Quercus guyavifolia	2.5	10	2.1	2	stem	74.5
YN006	3	1	Quercus guyavifolia	2.5	10	2.1	2	root	74.3
YN006	1	1	Vaccinium bracteatum Thunb.	2.5	15	2.2	1	stem	63.1
YN006	2	1	Vaccinium bracteatum Thunb.	2.5	17	2.4	2	leaf	52.3
YN006	1	1	Vaccinium bracteatum Thunb.	2.5	15	2.2	1	leaf	52.8
YN006	3	1	Vaccinium bracteatum Thunb.	2.5	20	2.4	2	leaf	53.8
YN006	3	1	Vaccinium bracteatum Thunb.	2.5	20	2.4	2	stem	65.5
YN006	2	1	Vaccinium bracteatum Thunb.	2.5	17	2.4	2	stem	64.7
YN006	1	1	Vaccinium bracteatum Thunb.	2.5	15	2.2	1	root	57.8
YN006	3	1	Vaccinium bracteatum Thunb.	2.5	20	2.4	2	root	64.9
YN006	2	1	Vaccinium bracteatum Thunb.	2.5	17	2.4	2	root	77.2
YN010	2	1	Myrica nana A. Cheval.	1	75	0.65	1	leaf	58.5
YN010	3	1	Myrica nana A. Cheval.	1	80	0.8	1	leaf	52.9
YN010	1	1	Myrica nana A. Cheval.	1	70	0.7	1	stem	60.7
YN010	1	1	Myrica nana A. Cheval.	1	70	0.7	1	root	58.5
YN010	2	1	Myrica nana A. Cheval.	1	75	0.65	1	stem	57.8
YN010	2	1	Myrica nana A. Cheval.	1	75	0.65	1	root	52.5
YN010	3	1	Myrica nana A. Cheval.	1	80	0.8	1	stem	67.1
YN010	3	1	Myrica nana A. Cheval.	1	80	0.8	1	root	56.1
YN010	2	1	Vaccinium bracteatum Thunb.	1.5	70	1.1	3	leaf	49
YN010	2	1	Vaccinium bracteatum Thunb.	1.5	70	1.1	3	stem	62.1
YN010	2	1	Vaccinium bracteatum Thunb.	1.5	70	1.1	3	root	60.6
YN011	2	1	Myrica nana A. Cheval.	0.5	45	0.6	1	leaf	64.3
YN011	3	1	Myrica nana A. Cheval.	0.5	45	0.45	2	leaf	54.4
YN011	2	1	Myrica nana A. Cheval.	0.5	45	0.6	1	stem	67.2
YN011	1	1	Myrica nana A. Cheval.	0.5	85	0.65	1	leaf	54.6
YN011	3	1	Myrica nana A. Cheval.	0.5	45	0.45	2	stem	70.2
YN011	1	1	Myrica nana A. Cheval.	0.5	85	0.65	1	stem	61.9
YN011	1	1	Myrica nana A. Cheval.	0.5	85	0.65	1	root	50.4
YN011	2	1	Myrica nana A. Cheval.	0.5	45	0.6	1	root	65.5
YN011	3	1	Myrica nana A. Cheval.	0.5	45	0.45	2	root	60.5
YN011	2	1	Vaccinium bracteatum Thunb.	2	40	1.65	3	leaf	54.5
YN011	3	1	Vaccinium bracteatum Thunb.	2	50	1.55	3	leaf	54.4
YN011	2	1	Vaccinium bracteatum Thunb.	2	40	1.65	3	stem	67.5
YN011	3	1	Vaccinium bracteatum Thunb.	2	50	1.55	3	stem	60.1
YN011	3	1	Vaccinium bracteatum Thunb.	2	50	1.55	3	root	76.3
YN011	2	1	Vaccinium bracteatum Thunb.	2	40	1.65	3	root	62.6
YN012	1	1	Vaccinium fragile Franch.	0.5	20	0.35	3	leaf	47.9
YN012	1	1	Vaccinium fragile Franch.	0.5	20	0.35	3	stem	57.8
YN012	2	1	Vaccinium fragile Franch.	0.5	35	0.4	3	leaf	48.7
YN012	2	1	Vaccinium fragile Franch.	0.5	35	0.4	3	stem	66
YN012	1	1	Vaccinium fragile Franch.	0.5	20	0.35	3	root	62.9
YN012	2	1	Vaccinium fragile Franch.	0.5	35	0.4	3	root	72.5
YN012	1	1	Vaccinium bracteatum Thunb.	0.5	10	0.8	1	leaf	50.8
YN012	1	1	Vaccinium bracteatum Thunb.	0.5	10	0.8	1	stem	57.3
YN012	1	1	Vaccinium bracteatum Thunb.	0.5	10	0.8	1	root	52.7
YN012	2	1	Rhododendron adenogynum Diels	2	50	1.05	2	leaf	52.5
YN012	3	1	Rhododendron adenogynum Diels	2	71.5	75	3	leaf	49.3
YN012	1	1	Rhododendron adenogynum Diels	2	65	1.6	2	leaf	54.5
YN012	2	1	Rhododendron adenogynum Diels	2	50	1.05	2	stem	63.7
YN012	3	1	Rhododendron adenogynum Diels	2	71.5	75	3	stem	61.1
YN012	1	1	Rhododendron adenogynum Diels	2	65	1.6	2	stem	67.9
YN012	1	1	Rhododendron adenogynum Diels	2	65	1.6	2	root	65.3
YN012	2	1	Rhododendron adenogynum Diels	2	50	1.05	2	root	76.4
YN012	3	1	Rhododendron adenogynum Diels	2	71.5	75	3	root	67.6
YN013	1	1	Myrica nana A. Cheval.	0.5	70	0.65	1	leaf	46.2
YN013	1	1	Myrica nana A. Cheval.	0.5	70	0.65	1	stem	67.5
YN013	3	1	Myrica nana A. Cheval.	0.5	70	0.7	2	leaf	53.2
YN013	2	1	Myrica nana A. Cheval.	0.5	65	0.45	2	leaf	59.5
YN013	2	1	Myrica nana A. Cheval.	0.5	65	0.45	2	stem	69
YN013	3	1	Myrica nana A. Cheval.	0.5	70	0.7	2	stem	63.2
YN013	1	1	Myrica nana A. Cheval.	0.5	70	0.65	1	root	52
YN013	2	1	Myrica nana A. Cheval.	0.5	65	0.45	2	root	53.6
YN013	3	1	Myrica nana A. Cheval.	0.5	70	0.7	2	root	54.9
YN013	2	1	Ternstroemia gymnanthera (Wight et Arn.) Beddome	0.5	20	0.4	2	leaf	50
YN013	2	1	Ternstroemia gymnanthera (Wight et Arn.) Beddome	0.5	20	0.4	2	stem	68.4
YN013	2	1	Ternstroemia gymnanthera (Wight et Arn.) Beddome	0.5	20	0.4	2	root	52.3
YN013	3	1	Rhododendron adenogynum Diels	0.5	20	0.4	1	stem	58.2
YN013	3	1	Rhododendron adenogynum Diels	0.5	20	0.4	1	leaf	55.7
YN013	3	1	Rhododendron adenogynum Diels	0.5	20	0.4	1	root	61.2
YN013	1	1	Vaccinium bracteatum Thunb.	1.5	20	1.15	3	stem	52.8
YN013	1	1	Vaccinium bracteatum Thunb.	1.5	20	1.15	3	leaf	54.2
YN013	1	1	Vaccinium bracteatum Thunb.	1.5	20	1.15	3	root	49.9
YN016	3	1	Myrica nana A. Cheval.	0.5	0.35	0.4	1	leaf	55.8
YN016	3	1	Myrica nana A. Cheval.	0.5	0.35	0.4	1	stem	62.2
YN016	2	1	Myrica nana A. Cheval.	0.5	0.6	0.6	2	leaf	53.8
YN016	3	1	Myrica nana A. Cheval.	0.5	0.35	0.4	1	root	58.2
YN016	2	1	Myrica nana A. Cheval.	0.5	0.6	0.6	2	stem	66.4
YN016	2	1	Myrica nana A. Cheval.	0.5	0.6	0.6	2	root	65.6
YN016	1	1	Myrica nana A. Cheval.	1.5	0.45	1.2	2	leaf	56.3
YN016	1	1	Myrica nana A. Cheval.	1.5	0.45	1.2	2	stem	65.3
YN016	1	1	Myrica nana A. Cheval.	1.5	0.45	1.2	2	root	58.7
YN016	1	1	Vaccinium bracteatum Thunb.	1.5	0.3	1.25	2	leaf	46.1
YN016	1	1	Vaccinium bracteatum Thunb.	1.5	0.3	1.25	2	stem	46.1
YN016	1	1	Vaccinium bracteatum Thunb.	1.5	0.3	1.25	2	root	62
YN016	2	1	Vaccinium bracteatum Thunb.	2	0.3	1.75	4	leaf	46.3
YN016	2	1	Vaccinium bracteatum Thunb.	2	0.3	1.75	4	stem	45.3
YN016	2	1	Vaccinium bracteatum Thunb.	2	0.3	1.75	4	root	64.3
YN017	2	1	Myrica nana A. Cheval.	0.5	0.35	0.6	1	leaf	50.1
YN017	3	1	Myrica nana A. Cheval.	0.5	0.4	0.62	1	leaf	59.5
YN017	1	1	Myrica nana A. Cheval.	0.5	0.5	0.8	1	leaf	52.7
YN017	2	1	Myrica nana A. Cheval.	0.5	0.35	0.6	1	stem	61.8
YN017	3	1	Myrica nana A. Cheval.	0.5	0.4	0.62	1	stem	66.1
YN017	2	1	Myrica nana A. Cheval.	0.5	0.35	0.6	1	root	56.4
YN017	1	1	Myrica nana A. Cheval.	0.5	0.5	0.8	1	stem	58.2
YN017	3	1	Myrica nana A. Cheval.	0.5	0.4	0.62	1	root	63.3
YN017	1	1	Myrica nana A. Cheval.	0.5	0.5	0.8	1	root	62.1
YN017	1	1	Ternstroemia gymnanthera (Wight et Arn.) Beddome	0.5	0.2	0.55	1	leaf	44.2
YN017	2	1	Ternstroemia gymnanthera (Wight et Arn.) Beddome	0.5	0.27	0.67	1	leaf	42.8
YN017	1	1	Ternstroemia gymnanthera (Wight et Arn.) Beddome	0.5	0.2	0.55	1	stem	58.2
YN017	2	1	Ternstroemia gymnanthera (Wight et Arn.) Beddome	0.5	0.27	0.67	1	stem	56.2
YN017	2	1	Ternstroemia gymnanthera (Wight et Arn.) Beddome	0.5	0.27	0.67	1	root	52.7
YN017	1	1	Ternstroemia gymnanthera (Wight et Arn.) Beddome	0.5	0.2	0.55	1	root	60
YN017	3	1	Vaccinium bracteatum Thunb.	0.5	0.25	0.9	1	leaf	53.2
YN017	3	1	Vaccinium bracteatum Thunb.	0.5	0.25	0.9	1	stem	57.9
YN017	3	1	Vaccinium bracteatum Thunb.	0.5	0.25	0.9	1	root	60.6
YN018	1	1	Myrica nana A. Cheval.	0.5	73	0.72	1	leaf	57.4
YN018	3	1	Myrica nana A. Cheval.	0.5	43	0.46	1	stem	53.9
YN018	3	1	Myrica nana A. Cheval.	0.5	43	0.46	1	leaf	56
YN018	3	1	Myrica nana A. Cheval.	0.5	43	0.46	1	root	52.5
YN018	1	1	Myrica nana A. Cheval.	0.5	73	0.72	1	stem	59.7
YN018	1	1	Myrica nana A. Cheval.	0.5	73	0.72	1	root	60.2
YN018	2	1	Vaccinium fragile Franch.	0.5	14	0.34	1	stem	58.3
YN018	2	1	Vaccinium fragile Franch.	0.5	14	0.34	1	leaf	53.5
YN018	2	1	Vaccinium fragile Franch.	0.5	14	0.34	1	root	51.9
YN018	2	1	Vaccinium bracteatum Thunb.	1.5	88	1.37	1	leaf	50
YN018	2	1	Vaccinium bracteatum Thunb.	1.5	88	1.37	1	stem	53
YN018	2	1	Vaccinium bracteatum Thunb.	1.5	88	1.37	1	root	61
YN019	3	1	Myrica nana A. Cheval.	0.5	0.43	0.44	1	leaf	62.8
YN019	1	1	Myrica nana A. Cheval.	0.5	0.6	0.4	1	leaf	65.6
YN019	3	1	Myrica nana A. Cheval.	0.5	0.43	0.44	1	stem	77.5
YN019	1	1	Myrica nana A. Cheval.	0.5	0.6	0.4	1	stem	72.5
YN019	3	1	Myrica nana A. Cheval.	0.5	0.43	0.44	1	root	75.4
YN019	1	1	Myrica nana A. Cheval.	0.5	0.6	0.4	1	root	72.6
YN019	1	1	Vaccinium bracteatum Thunb.	1	0.38	0.65	1	leaf	56
YN019	3	1	Vaccinium bracteatum Thunb.	1	31	0.78	3	leaf	53.6
YN019	2	1	Vaccinium bracteatum Thunb.	1	0.41	0.73	1	leaf	43.5
YN019	1	1	Vaccinium bracteatum Thunb.	1	0.38	0.65	1	stem	72.5
YN019	3	1	Vaccinium bracteatum Thunb.	1	31	0.78	3	stem	59.5
YN019	2	1	Vaccinium bracteatum Thunb.	1	0.41	0.73	1	stem	63.2
YN019	1	1	Vaccinium bracteatum Thunb.	1	0.38	0.65	1	root	60
YN019	3	1	Vaccinium bracteatum Thunb.	1	31	0.78	3	root	66.2
YN019	2	1	Vaccinium bracteatum Thunb.	1	0.41	0.73	1	root	58.8
YN020	2	1	Elsholtzia rugulosa	0.5	21	0.43	8	leaf	31
YN020	2	1	Elsholtzia rugulosa	0.5	21	0.43	8	stem	59.2
YN020	2	1	Elsholtzia rugulosa	0.5	21	0.43	8	root	74.7
YN020	2	1	Myrica nana A. Cheval.	1	45	0.64	1	leaf	49
YN020	2	1	Myrica nana A. Cheval.	1	45	0.64	1	stem	56.8
YN020	3	1	Myrica nana A. Cheval.	1	89	0.71	2	leaf	55.9
YN020	3	1	Myrica nana A. Cheval.	1	89	0.71	2	root	52.5
YN020	3	1	Myrica nana A. Cheval.	1	89	0.71	2	stem	58.5
YN020	2	1	Myrica nana A. Cheval.	1	45	0.64	1	root	62
YN020	1	1	Vaccinium bracteatum Thunb.	2.5	88	2.42	1	leaf	50.2
YN020	1	1	Vaccinium bracteatum Thunb.	2.5	88	2.42	1	stem	77.7
YN020	1	1	Vaccinium bracteatum Thunb.	2.5	88	2.42	1	root	62.2
YN021	1	1	Myrsine africana Linn	0.5	31	0.47	1	leaf	53.7
YN021	2	1	Myrsine africana Linn	0.5	35	0.38	1	leaf	39.4
YN021	2	1	Myrsine africana Linn	0.5	35	0.38	1	stem	64.8
YN021	1	1	Myrsine africana Linn	0.5	31	0.47	1	stem	80.2
YN021	2	1	Myrsine africana Linn	0.5	35	0.38	1	root	84.4
YN021	1	1	Myrsine africana Linn	0.5	31	0.47	1	root	83
YN021	2	1	Osteomeles schwerinae C. K. Schneid	1	21	0.83	1	stem	1.2
YN021	3	1	Osteomeles schwerinae C. K. Schneid	1	48	0.74	1	root	77.3
YN021	2	1	Osteomeles schwerinae C. K. Schneid	1	21	0.83	1	leaf	55
YN021	3	1	Osteomeles schwerinae C. K. Schneid	1	48	0.74	1	leaf	69.3
YN021	3	1	Osteomeles schwerinae C. K. Schneid	1	48	0.74	1	stem	67.5
YN021	2	1	Osteomeles schwerinae C. K. Schneid	1	21	0.83	1	root	78.4
YN021	1	1	Pyrus calleryana Decne	1	28	0.54	1	leaf	56.2
YN021	1	1	Pyrus calleryana Decne	1	28	0.54	1	stem	50.4
YN021	1	1	Pyrus calleryana Decne	1	28	0.54	1	root	63.1
YN021	3	1	Myrsine africana Linn	1	32	0.65	2	leaf	47.3
YN021	3	1	Myrsine africana Linn	1	32	0.65	2	stem	58.8
YN021	3	1	Myrsine africana Linn	1	32	0.65	2	root	68.2
YN022	1	1	Myrica nana A. Cheval.	1	54	0.61	1	stem	0.5
YN022	2	1	Myrica nana A. Cheval.	1	38	0.59	1	leaf	54.5
YN022	1	1	Myrica nana A. Cheval.	1	54	0.61	1	leaf	57.2
YN022	3	1	Myrica nana A. Cheval.	1	95	0.72	1	leaf	54.1
YN022	2	1	Myrica nana A. Cheval.	1	38	0.59	1	stem	68.4
YN022	2	1	Myrica nana A. Cheval.	1	38	0.59	1	root	65.1
YN022	3	1	Myrica nana A. Cheval.	1	95	0.72	1	stem	66.8
YN022	1	1	Myrica nana A. Cheval.	1	54	0.61	1	root	55.5
YN022	3	1	Myrica nana A. Cheval.	1	95	0.72	1	root	51.1
YN022	2	1	Vaccinium bracteatum Thunb.	2	83	1.68	1	leaf	49.7
YN022	2	1	Vaccinium bracteatum Thunb.	2	83	1.68	1	stem	61.5
YN022	2	1	Vaccinium bracteatum Thunb.	2	83	1.68	1	root	55.5
YN023	3	1	Osteomeles schwerinae C. K. Schneid	0.5		0.38		leaf	73.2
YN023	3	1	Osteomeles schwerinae C. K. Schneid	0.5		0.38		root	82.4
YN023	3	1	Osteomeles schwerinae C. K. Schneid	0.5		0.38		stem	77.3
YN023	1	1	Sophora davidii (Franch.) Skeels	1.5		1.42	1	leaf	69.1
YN023	1	1	Sophora davidii (Franch.) Skeels	1.5		1.42	1	stem	82.8
YN023	1	1	Sophora davidii (Franch.) Skeels	1.5		1.42	1	root	67.4
YN023	2	1	Dalbergia yunnanensis Franch. var. collettii (Prain) Thoth	2		2.02	1	leaf	63.5
YN023	2	1	Dalbergia yunnanensis Franch. var. collettii (Prain) Thoth	2		2.02	1	root	77
YN023	2	1	Dalbergia yunnanensis Franch. var. collettii (Prain) Thoth	2		2.02	1	stem	75.1
YN024	1	1	Myrica nana A. Cheval.	0.5	38	0.41	1	leaf	55.9
YN024	1	1	Myrica nana A. Cheval.	0.5	38	0.41	1	stem	68.6
YN024	1	1	Myrica nana A. Cheval.	0.5	38	0.41	1	root	52.2
YN024	2	1	Myrica nana A. Cheval.	1	88	0.57	1	leaf	63.3
YN024	3	1	Myrica nana A. Cheval.	1	84	0.76	1	leaf	69.8
YN024	2	1	Myrica nana A. Cheval.	1	88	0.57	1	stem	75
YN024	3	1	Myrica nana A. Cheval.	1	84	0.76	1	stem	68.5
YN024	3	1	Myrica nana A. Cheval.	1	84	0.76	1	root	67.2
YN024	2	1	Myrica nana A. Cheval.	1	88	0.57	1	root	59.1
YN024	3	1	Vaccinium bracteatum Thunb.	1.5	21	1.4	1	leaf	51.2
YN024	3	1	Vaccinium bracteatum Thunb.	1.5	21	1.4	1	stem	55.2
YN024	3	1	Vaccinium bracteatum Thunb.	1.5	21	1.4	1	root	59.4
YN024	1	1	Vaccinium bracteatum Thunb.	2.5	52	2.14	1	leaf	51.9
YN024	1	1	Vaccinium bracteatum Thunb.	2.5	52	2.14	1	stem	47.6
YN024	1	1	Vaccinium bracteatum Thunb.	2.5	52	2.14	1	root	52.9
YN025	2	1	Myrica nana A. Cheval.	0.5	33	0.38	1	leaf	63.8
YN025	2	1	Myrica nana A. Cheval.	0.5	33	0.38	1	stem	70.2
YN025	2	1	Myrica nana A. Cheval.	0.5	33	0.38	1	root	63.5
YN025	3	1	Myrica nana A. Cheval.	1	96	0.85	1	leaf	59.8
YN025	1	1	Myrica nana A. Cheval.	1	68	0.83	1	leaf	72.4
YN025	1	1	Myrica nana A. Cheval.	1	68	0.83	1	stem	67
YN025	3	1	Myrica nana A. Cheval.	1	96	0.85	1	stem	66.9
YN025	1	1	Myrica nana A. Cheval.	1	68	0.83	1	root	59
YN025	3	1	Myrica nana A. Cheval.	1	96	0.85	1	root	72.4
YN025	2	1	Vaccinium bracteatum Thunb.	1.5	31	1.35	1	leaf	41.4
YN025	2	1	Vaccinium bracteatum Thunb.	1.5	31	1.35	1	stem	53.8
YN025	2	1	Vaccinium bracteatum Thunb.	1.5	31	1.35	1	root	49.4
YN025	1	1	Vaccinium bracteatum Thunb.	2	45	1.83	1	leaf	57
YN025	1	1	Vaccinium bracteatum Thunb.	2	45	1.83	1	stem	53.6
YN025	1	1	Vaccinium bracteatum Thunb.	2	45	1.83	1	root	54.5
YN026	1	1	Myrica nana A. Cheval.	0.5	86	0.91	1	leaf	66.4
YN026	1	1	Myrica nana A. Cheval.	0.5	86	0.91	1	stem	71.4
YN026	1	1	Myrica nana A. Cheval.	0.5	86	0.91	1	root	62.7
YN026	2	1	Myrica nana A. Cheval.	1.5	90	1.23	1	leaf	59.4
YN026	3	1	Myrica nana A. Cheval.	1.5	81	1.04	1	leaf	57.3
YN026	3	1	Myrica nana A. Cheval.	1.5	81	1.04	1	stem	58.8
YN026	3	1	Myrica nana A. Cheval.	1.5	81	1.04	1	root	59.3
YN026	2	1	Myrica nana A. Cheval.	1.5	90	1.23	1	stem	61.4
YN026	2	1	Myrica nana A. Cheval.	1.5	90	1.23	1	root	65.9
YN026	3	1	Myrsine africana Linn	2	13	1.71	1	leaf	42.43
YN026	3	1	Myrsine africana Linn	2	13	1.71	1	root	59.1
YN026	3	1	Myrsine africana Linn	2	13	1.71	1	stem	64.8
YN027	1	1	Myrica nana A. Cheval.	0.5	27	0.43	1	leaf	39.1
YN027	1	1	Myrica nana A. Cheval.	0.5	27	0.43	1	stem	83.9
YN027	1	1	Myrica nana A. Cheval.	0.5	27	0.43	1	root	69
YN027	3	1	Myrica nana A. Cheval.	1	59	0.85	1	leaf	57.4
YN027	3	1	Myrica nana A. Cheval.	1	59	0.85	1	stem	67.5
YN027	3	1	Myrica nana A. Cheval.	1	59	0.85	1	root	59.4
YN027	3	1	Myrsine africana Linn	1	10	0.93	1	leaf	54.8
YN027	3	1	Myrsine africana Linn	1	10	0.93	1	root	69.9
YN027	3	1	Myrsine africana Linn	1	10	0.93	1	stem	72
YN027	2	1	Vaccinium bracteatum Thunb.	1.5	33	1.31	1	leaf	48.9
YN027	1	1	Vaccinium bracteatum Thunb.	1.5	37	1.07	1	leaf	42.6
YN027	2	1	Vaccinium bracteatum Thunb.	1.5	33	1.31	1	stem	65.2
YN027	1	1	Vaccinium bracteatum Thunb.	1.5	37	1.07	1	stem	59.7
YN027	2	1	Vaccinium bracteatum Thunb.	1.5	33	1.31	1	root	60.2
YN027	1	1	Vaccinium bracteatum Thunb.	1.5	37	1.07	1	root	58.4
YN027	2	1	Myrica nana A. Cheval.	2	47	1.72	1	leaf	64.9
YN027	2	1	Myrica nana A. Cheval.	2	47	1.72	1	stem	70.9
YN027	2	1	Myrica nana A. Cheval.	2	47	1.72	1	root	57.5
YN028	2	1	Viburnum foetidum Wall					leaf	43.7
YN028	2	1	Viburnum foetidum Wall					root	55.4
YN028	2	1	Viburnum foetidum Wall					stem	71
YN028	2	1	Myrica nana A. Cheval.	1	55	0.76	1	leaf	57.6
YN028	1	1	Myrica nana A. Cheval.	1	74	0.91	1	leaf	69.1
YN028	2	1	Myrica nana A. Cheval.	1	55	0.76	1	stem	61.2
YN028	2	1	Myrica nana A. Cheval.	1	55	0.76	1	root	62.1
YN028	1	1	Myrica nana A. Cheval.	1	74	0.91	1	stem	58.4
YN028	1	1	Myrica nana A. Cheval.	1	74	0.91	1	root	55.5
YN028	3	1	Elsholtzia rugulosa	1	19	0.37	1	leaf	38.5
YN028	3	1	Elsholtzia rugulosa	1	19	0.37	1	stem	61.8
YN028	3	1	Elsholtzia rugulosa	1	19	0.37	1	root	68.3
YN028	3	1	Myrica nana A. Cheval.	1.5	66	1.21	1	leaf	65.2
YN028	3	1	Myrica nana A. Cheval.	1.5	66	1.21	1	stem	62.1
YN028	3	1	Myrica nana A. Cheval.	1.5	66	1.21	1	root	61.3
YN028	1	1	Viburnum foetidum Wall	1.5	21	1.38	1	leaf	45.6
YN028	1	1	Viburnum foetidum Wall	1.5	21	1.38	1	root	51.2
YN028	1	1	Viburnum foetidum Wall	1.5	21	1.38	1	stem	64.6
YN029	1	1	Myrica nana A. Cheval.	1	67	0.75	1	leaf	64.5
YN029	2	1	Myrica nana A. Cheval.	1	54	0.56	1	leaf	72.4
YN029	3	1	Myrica nana A. Cheval.	1	58	0.62	1	leaf	63.3
YN029	1	1	Myrica nana A. Cheval.	1	67	0.75	1	stem	57.5
YN029	2	1	Myrica nana A. Cheval.	1	54	0.56	1	stem	67.3
YN029	3	1	Myrica nana A. Cheval.	1	58	0.62	1	stem	61.8
YN029	1	1	Myrica nana A. Cheval.	1	67	0.75	1	root	60
YN029	3	1	Myrica nana A. Cheval.	1	58	0.62	1	root	57.9
YN029	2	1	Myrica nana A. Cheval.	1	54	0.56	1	root	64.6
YN029	2	1	Myrsine africana Linn	1	20	0.78	1	leaf	59.7
YN029	2	1	Myrsine africana Linn	1	20	0.78	1	root	68.9
YN029	2	1	Myrsine africana Linn	1	20	0.78	1	stem	76.6
YN029	1	1	Vaccinium bracteatum Thunb.	1.5	38	1.24	1	leaf	56.1
YN029	1	1	Vaccinium bracteatum Thunb.	1.5	38	1.24	1	stem	61.3
YN029	1	1	Vaccinium bracteatum Thunb.	1.5	38	1.24	1	root	60.9
YN029	3	1	Myrsine africana Linn	1.5	41	1.34	1	leaf	55.9
YN029	3	1	Myrsine africana Linn	1.5	41	1.34	1	root	75.7
YN029	3	1	Myrsine africana Linn	1.5	41	1.34	1	stem	62.6
YN030	1	1	Myrica nana A. Cheval.	1	83	0.64	1	leaf	65.5
YN030	1	1	Myrica nana A. Cheval.	1	83	0.64	1	stem	61.2
YN030	1	1	Myrica nana A. Cheval.	1	83	0.64	1	root	83
YN030	3	1	Myrica nana A. Cheval.	1.5	69	1.35	1	leaf	59.6
YN030	2	1	Myrica nana A. Cheval.	1.5	68	1.21	1	leaf	53.4
YN030	2	1	Myrica nana A. Cheval.	1.5	68	1.21	1	stem	63.5
YN030	3	1	Myrica nana A. Cheval.	1.5	69	1.35	1	stem	67.7
YN030	2	1	Myrica nana A. Cheval.	1.5	68	1.21	1	root	56.3
YN030	3	1	Myrica nana A. Cheval.	1.5	69	1.35	1	root	76.5
YN030	3	1	Vaccinium bracteatum Thunb.	1.5	55	1.44	1	leaf	56.6
YN030	2	1	Vaccinium bracteatum Thunb.	1.5	54	1.41	1	leaf	62.6
YN030	2	1	Vaccinium bracteatum Thunb.	1.5	54	1.41	1	stem	61
YN030	2	1	Vaccinium bracteatum Thunb.	1.5	54	1.41	1	root	89
YN030	3	1	Vaccinium bracteatum Thunb.	1.5	55	1.44	1	stem	72.4
YN030	3	1	Vaccinium bracteatum Thunb.	1.5	55	1.44	1	root	105.1
YN034	1	1	Craspedolobium unijugum (Gagnepain) Z. Wei & Pedley	3	35	2.6	1	leaf	51
YN034	1	1	Craspedolobium unijugum (Gagnepain) Z. Wei & Pedley	3	35	2.6	1	root	54.7
YN034	1	1	Craspedolobium unijugum (Gagnepain) Z. Wei & Pedley	3	35	2.6	1	stem	50.2
YN034	2	1	Wendlandia tinctoria (Roxb.) DC.	1	60	5.4	1	root	53.9
YN034	3	1	Wendlandia tinctoria (Roxb.) DC.	1	58	5.7	1	leaf	54
YN034	2	1	Wendlandia tinctoria (Roxb.) DC.	1	60	5.4	1	leaf	67.2
YN034	3	1	Wendlandia tinctoria (Roxb.) DC.	1	58	5.7	1	root	60.2
YN034	3	1	Wendlandia tinctoria (Roxb.) DC.	1	58	5.7	1	stem	43.5
YN034	2	1	Wendlandia tinctoria (Roxb.) DC.	1	60	5.4	1	stem	53.3
YN038	1	1	Myrica nana A. Cheval.	1	20	0.7	1	leaf	66.1
YN038	1	1	Myrica nana A. Cheval.	1	20	0.7	1	stem	75.4
YN038	3	1	Myrica nana A. Cheval.	1	30	0.7	1	leaf	67.7
YN038	3	1	Myrica nana A. Cheval.	1	30	0.7	1	stem	77.4
YN038	1	1	Myrica nana A. Cheval.	1	20	0.7	1	root	74.8
YN038	3	1	Myrica nana A. Cheval.	1	30	0.7	1	root	71.7
YN038	2	1	小Myrsine africana Linn	1	5	0.8	1	leaf	65.5
YN038	2	1	小Myrsine africana Linn	1	5	0.8	1	stem	89.2
YN038	2	1	小Myrsine africana Linn	1	5	0.8	1	root	72.5
YN038	2	1	Myrica nana A. Cheval.	1.5	20	1	1	leaf	71.3
YN038	2	1	Myrica nana A. Cheval.	1.5	20	1	1	stem	77.5
YN038	2	1	Myrica nana A. Cheval.	1.5	20	1	1	root	70.7
YN038	3	1	Vaccinium bracteatum Thunb.	2	5	2	1	leaf	55.1
YN038	1	1	Vaccinium bracteatum Thunb.	2	5	1.7	1	leaf	77
YN038	3	1	Vaccinium bracteatum Thunb.	2	5	2	1	stem	60.4
YN038	3	1	Vaccinium bracteatum Thunb.	2	5	2	1	root	64.1
YN038	1	1	Vaccinium bracteatum Thunb.	2	5	1.7	1	stem	75.4
YN038	1	1	Vaccinium bracteatum Thunb.	2	5	1.7	1	root	96.9
YN039	3	1	Myrica nana A. Cheval.	1.5	37	1.15	5	stem	77.4
YN039	3	1	Myrica nana A. Cheval.	1.5	37	1.15	5	leaf	55.7
YN039	2	1	Myrica nana A. Cheval.	1.5	35	1.25	4	leaf	51.3
YN039	1	1	Myrica nana A. Cheval.	1.5	40	1.2	5	leaf	57.4
YN039	1	1	Myrica nana A. Cheval.	1.5	40	1.2	5	stem	69.2
YN039	2	1	Myrica nana A. Cheval.	1.5	35	1.25	4	stem	83.8
YN039	3	1	Myrica nana A. Cheval.	1.5	37	1.15	5	root	87.1
YN039	2	1	Myrica nana A. Cheval.	1.5	35	1.25	4	root	65.9
YN039	1	1	Myrica nana A. Cheval.	1.5	40	1.2	5	root	82.4
YN039	1	1	Vaccinium bracteatum Thunb.	2	20	1.7	3	leaf	48.6
YN039	2	1	Vaccinium bracteatum Thunb.	2	15	1.68	2	leaf	54.5
YN039	3	1	Vaccinium bracteatum Thunb.	2	20	1.75	3	leaf	54.6
YN039	3	1	Vaccinium bracteatum Thunb.	2	20	1.75	3	stem	75.2
YN039	2	1	Vaccinium bracteatum Thunb.	2	15	1.68	2	stem	80.8
YN039	1	1	Vaccinium bracteatum Thunb.	2	20	1.7	3	stem	77.2
YN039	1	1	Vaccinium bracteatum Thunb.	2	20	1.7	3	root	84
YN039	3	1	Vaccinium bracteatum Thunb.	2	20	1.75	3	root	72.8
YN039	2	1	Vaccinium bracteatum Thunb.	2	15	1.68	2	root	75
YN040	3	1	Myrica nana A. Cheval.	0.5	40	0.4	4	leaf	65.5
YN040	2	1	Myrica nana A. Cheval.	0.5	35	0.6	3	leaf	69.2
YN040	3	1	Myrica nana A. Cheval.	0.5	40	0.4	4	root	29
YN040	3	1	Myrica nana A. Cheval.	0.5	40	0.4	4	stem	63.6
YN040	1	1	Myrica nana A. Cheval.	0.5	40	0.8	2	leaf	63.9
YN040	2	1	Myrica nana A. Cheval.	0.5	35	0.6	3	stem	67.9
YN040	2	1	Myrica nana A. Cheval.	0.5	35	0.6	3	root	71.7
YN040	1	1	Myrica nana A. Cheval.	0.5	40	0.8	2	stem	68.8
YN040	1	1	Myrica nana A. Cheval.	0.5	40	0.8	2	root	83
YN040	2	1	Vaccinium bracteatum Thunb.	1.5	20	1.2	3	leaf	56.7
YN040	1	1	Vaccinium bracteatum Thunb.	1.5	25	1.4	2	leaf	50.2
YN040	2	1	Vaccinium bracteatum Thunb.	1.5	20	1.2	3	stem	64.2
YN040	2	1	Vaccinium bracteatum Thunb.	1.5	20	1.2	3	root	54.1
YN040	1	1	Vaccinium bracteatum Thunb.	1.5	25	1.4	2	stem	64.1
YN040	1	1	Vaccinium bracteatum Thunb.	1.5	25	1.4	2	root	68.9
YN040	3	1	Vaccinium bracteatum Thunb.	2	20	1.7	2	leaf	82
YN040	3	1	Vaccinium bracteatum Thunb.	2	20	1.7	2	stem	59.5
YN040	3	1	Vaccinium bracteatum Thunb.	2	20	1.7	2	root	69.9
YN041	1	1	Myrica nana A. Cheval.	0.5	64	0.54	1	leaf	57
YN041	2	1	Myrica nana A. Cheval.	0.5	78	0.84		leaf	48.7
YN041	3	1	Myrica nana A. Cheval.	0.5	86	0.88		leaf	52.1
YN041	1	1	Myrica nana A. Cheval.	0.5	64	0.54	1	stem	97.5
YN041	2	1	Myrica nana A. Cheval.	0.5	78	0.84		stem	75.2
YN041	3	1	Myrica nana A. Cheval.	0.5	86	0.88		stem	62.8
YN041	2	1	Myrica nana A. Cheval.	0.5	78	0.84		root	72.3
YN041	3	1	Myrica nana A. Cheval.	0.5	86	0.88		root	70
YN041	1	1	Myrica nana A. Cheval.	0.5	64	0.54	1	root	74.4
YN041	3	1	Vaccinium bracteatum Thunb.	0.5	46	0.92		leaf	48.4
YN041	3	1	Vaccinium bracteatum Thunb.	0.5	46	0.92		stem	50.8
YN041	3	1	Vaccinium bracteatum Thunb.	0.5	46	0.92		root	65.7
YN042	1	1	Quercus fabri Hance	2	82	1.76		leaf	56.5
YN042	1	1	Quercus fabri Hance	2	82	1.76	3	root	55.7
YN042	1	1	Quercus fabri Hance	2	82	1.76		stem	62.2
YN042	2	1	Corylus heterophylla Fisch	2	20	1.65	1	leaf	42
YN042	1	1	Corylus heterophylla Fisch	2	22	1.73	1	leaf	45.7
YN042	3	1	Corylus heterophylla Fisch	2	25	1.75	1	leaf	44.9
YN042	3	1	Corylus heterophylla Fisch	2	25	1.75	1	stem	74.3
YN042	2	1	Corylus heterophylla Fisch	2	20	1.65	1	stem	72.8
YN042	1	1	Corylus heterophylla Fisch	2	22	1.73	1	stem	73.6
YN042	2	1	Corylus heterophylla Fisch	2	20	1.65	1	root	57.1
YN042	3	1	Corylus heterophylla Fisch	2	25	1.75	1	root	55.7
YN042	1	1	Corylus heterophylla Fisch	2	22	1.73	1	root	67.1
YN042	2	1	Quercus fabri Hance	2.5	88	2.32	3	leaf	56.7
YN042	2	1	Quercus fabri Hance	2.5	88	2.32	3	stem	52
YN042	2	1	Quercus fabri Hance	2.5	88	2.32	3	root	61.1
YN042	3	1	Quercus fabri Hance	2.5-3	88	2.64	2	leaf	64.8
YN042	3	1	Quercus fabri Hance	2.5-3	88	2.64	2	stem	73.1
YN042	3	1	Quercus fabri Hance	2.5-3	88	2.64	2	root	61.6
YN043	3	1	Rhododendron racemosum Franch	1.5	58	1.2	1	leaf	44.3
YN043	1	1	Rhododendron racemosum Franch	1.5	68	1.3	2	leaf	46.2
YN043	2	1	Rhododendron racemosum Franch	1.5	64	1.7	2	leaf	49.1
YN043	3	1	Rhododendron racemosum Franch	1.5	58	1.2	1	stem	61.7
YN043	2	1	Rhododendron racemosum Franch	1.5	64	1.7	2	stem	68.5
YN043	1	1	Rhododendron racemosum Franch	1.5	68	1.3	2	stem	77.3
YN043	3	1	Rhododendron racemosum Franch	1.5	58	1.2	1	root	62.2
YN043	1	1	Rhododendron racemosum Franch	1.5	68	1.3	2	root	53.2
YN043	2	1	Rhododendron racemosum Franch	1.5	64	1.7	2	root	67.4
YN044	3	1	Myrica nana A. Cheval.	0.5	46	0.7	3	leaf	57.1
YN044	1	1	Myrica nana A. Cheval.	0.5	72	0.8	5	leaf	65.8
YN044	2	1	Myrica nana A. Cheval.	0.5	74	0.7	6	leaf	63.7
YN044	3	1	Myrica nana A. Cheval.	0.5	46	0.7	3	stem	78.2
YN044	1	1	Myrica nana A. Cheval.	0.5	72	0.8	5	stem	68
YN044	2	1	Myrica nana A. Cheval.	0.5	74	0.7	6	stem	70.1
YN044	3	1	Myrica nana A. Cheval.	0.5	46	0.7	3	root	62.4
YN044	1	1	Myrica nana A. Cheval.	0.5	72	0.8	5	root	65
YN044	2	1	Myrica nana A. Cheval.	0.5	74	0.7	6	root	65
YN044	2	1	小Myrsine africana Linn	0.5	42	0.8	8	leaf	68.8
YN044	2	1	小Myrsine africana Linn	0.5	42	0.8	8	root	77.1
YN044	2	1	小Myrsine africana Linn	0.5	42	0.8	8	stem	98.8
YN044	1	1	Vaccinium bracteatum Thunb.	1.5	34	1.2	1	leaf	58.2
YN044	1	1	Vaccinium bracteatum Thunb.	1.5	34	1.2	1	stem	62.3
YN044	1	1	Vaccinium bracteatum Thunb.	1.5	34	1.2	1	root	60.1
YN045	3	1	Rhododendron racemosum Franch	1.5	68	1.2	1	leaf	51.7
YN045	1	1	Rhododendron racemosum Franch	1.5	71	1.2	5	leaf	53.2
YN045	2	1	Rhododendron racemosum Franch	1.5	73	1.3	3	leaf	61.6
YN045	3	1	Rhododendron racemosum Franch	1.5	68	1.2	1	stem	70.9
YN045	2	1	Rhododendron racemosum Franch	1.5	73	1.3	3	stem	64.9
YN045	1	1	Rhododendron racemosum Franch	1.5	71	1.2	5	stem	67.2
YN045	3	1	Rhododendron racemosum Franch	1.5	68	1.2	1	root	59.3
YN045	2	1	Rhododendron racemosum Franch	1.5	73	1.3	3	root	67.8
YN045	1	1	Rhododendron racemosum Franch	1.5	71	1.2	5	root	68.1
YN046	1	1	Rhododendron racemosum Franch	1.5	78	1.2	5	leaf	60.4
YN046	3	1	Rhododendron racemosum Franch	1.5	84	1.3	6	leaf	64.8
YN046	2	1	Rhododendron racemosum Franch	1.5	94	1.3	8	leaf	59.7
YN046	2	1	Rhododendron racemosum Franch	1.5	94	1.3	8	stem	51.5
YN046	1	1	Rhododendron racemosum Franch	1.5	78	1.2	5	stem	69.2
YN046	3	1	Rhododendron racemosum Franch	1.5	84	1.3	6	stem	71.1
YN046	1	1	Rhododendron racemosum Franch	1.5	78	1.2	5	root	63
YN046	3	1	Rhododendron racemosum Franch	1.5	84	1.3	6	root	61.8
YN046	2	1	Rhododendron racemosum Franch	1.5	94	1.3	8	root	58.1
YN047	1	1	Rosa sericea Lindl	0.5	73	2.3	5	leaf	54.6
YN047	1	1	Rosa sericea Lindl	0.5	73	2.3	5	root	65.5
YN047	1	1	Rosa sericea Lindl	0.5	73	2.3	5	stem	72
YN047	2	1	Cotoneaster adpressus Bois	0.5	65	0.15	4	leaf	75.8
YN047	3	1	Cotoneaster adpressus Bois	0.5	61	0.2	6	leaf	74.8
YN047	1	1	Cotoneaster adpressus Bois	0.5	63	0.2	8	leaf	73.3
YN047	2	1	Cotoneaster adpressus Bois	0.5	65	0.15	4	stem	81.3
YN047	3	1	Cotoneaster adpressus Bois	0.5	61	0.2	6	stem	79.8
YN047	1	1	Cotoneaster adpressus Bois	0.5	63	0.2	8	stem	78
YN047	2	1	Cotoneaster adpressus Bois	0.5	65	0.15	4	root	79.2
YN047	3	1	Cotoneaster adpressus Bois	0.5	61	0.2	6	root	80.6
YN047	1	1	Cotoneaster adpressus Bois	0.5	63	0.2	8	root	73.1
YN048	3	1	Rhododendron telmateium Balf. F. et W. W. Smith	0.5	72	0.5	4	leaf	67.2
YN048	1	1	Rhododendron telmateium Balf. F. et W. W. Smith	0.5	73	0.5	5	leaf	67.1
YN048	2	1	Rhododendron telmateium Balf. F. et W. W. Smith	0.5	75	0.5	8	leaf	65.1
YN048	1	1	Rhododendron telmateium Balf. F. et W. W. Smith	0.5	73	0.5	5	stem	71.2
YN048	3	1	Rhododendron telmateium Balf. F. et W. W. Smith	0.5	72	0.5	4	stem	83.9
YN048	3	1	Rhododendron telmateium Balf. F. et W. W. Smith	0.5	72	0.5	4	root	65.3
YN048	2	1	Rhododendron telmateium Balf. F. et W. W. Smith	0.5	75	0.5	8	stem	84.5
YN048	1	1	Rhododendron telmateium Balf. F. et W. W. Smith	0.5	73	0.5	5	root	68.1
YN048	2	1	Rhododendron telmateium Balf. F. et W. W. Smith	0.5	75	0.5	8	root	78
YN049	3	1	Rhododendron racemosum Franch	0.5	70	0.7	3	leaf	59.2
YN049	1	1	Rhododendron racemosum Franch	0.5	71	0.7	5	leaf	63.1
YN049	2	1	Rhododendron racemosum Franch	0.5	73	0.6	8	leaf	49.9
YN049	3	1	Rhododendron racemosum Franch	0.5	70	0.7	3	stem	66.5
YN049	1	1	Rhododendron racemosum Franch	0.5	71	0.7	5	stem	63.3
YN049	2	1	Rhododendron racemosum Franch	0.5	73	0.6	8	stem	64.9
YN049	3	1	Rhododendron racemosum Franch	0.5	70	0.7	3	root	63.2
YN049	1	1	Rhododendron racemosum Franch	0.5	71	0.7	5	root	61.4
YN049	2	1	Rhododendron racemosum Franch	0.5	73	0.6	8	root	62.8
YN050	1	1	Vaccinium bracteatum Thunb.	0.5	54	0.6	3	leaf	48.5
YN050	1	1	Vaccinium bracteatum Thunb.	0.5	54	0.6	3	stem	71.1
YN050	1	1	Vaccinium bracteatum Thunb.	0.5	54	0.6	3	root	62.8
YN050	1	1	Myrica nana A. Cheval.	1.5	72	1.1	3	leaf	41.2
YN050	2	1	Myrica nana A. Cheval.	1.5	73	1.2	5	leaf	50.7
YN050	1	1	Myrica nana A. Cheval.	1.5	72	1.1	3	stem	70.3
YN050	3	1	Myrica nana A. Cheval.	1.5	74	1.4	6	leaf	61.1
YN050	2	1	Myrica nana A. Cheval.	1.5	73	1.2	5	stem	74.5
YN050	3	1	Myrica nana A. Cheval.	1.5	74	1.4	6	stem	78.9
YN050	1	1	Myrica nana A. Cheval.	1.5	72	1.1	3	root	83.1
YN050	2	1	Myrica nana A. Cheval.	1.5	73	1.2	5	root	71
YN050	3	1	Myrica nana A. Cheval.	1.5	74	1.4	6	root	75
YN051	3	1	Zanthoxylum planispinum Sieb．Et Zucc	2.5	85	3.8	3	leaf	35.6
YN051	1	1	Zanthoxylum planispinum Sieb．Et Zucc	2.5	84	3.8	5	leaf	35.4
YN051	2	1	Zanthoxylum planispinum Sieb．Et Zucc	2.5	86	3.9	8	leaf	29.8
YN051	3	1	Zanthoxylum planispinum Sieb．Et Zucc	2.5	85	3.8	3	stem	67.5
YN051	1	1	Zanthoxylum planispinum Sieb．Et Zucc	2.5	84	3.8	5	stem	66.2
YN051	2	1	Zanthoxylum planispinum Sieb．Et Zucc	2.5	86	3.9	8	stem	62.2
YN051	3	1	Zanthoxylum planispinum Sieb．Et Zucc	2.5	85	3.8	3	root	59.1
YN051	2	1	Zanthoxylum planispinum Sieb．Et Zucc	2.5	86	3.9	8	root	47.6
YN051	1	1	Zanthoxylum planispinum Sieb．Et Zucc	2.5	84	3.8	5	root	59.4
YN052	1	1	Myrica nana A. Cheval.	0.5	73	0.6	3	leaf	69.3
YN052	1	1	Myrica nana A. Cheval.	0.5	73	0.6	3	stem	69.2
YN052	2	1	Myrica nana A. Cheval.	0.5	71	0.8	5	leaf	73.3
YN052	2	1	Myrica nana A. Cheval.	0.5	71	0.8	5	stem	71
YN052	3	1	Myrica nana A. Cheval.	0.5	70	0.7	8	stem	78.4
YN052	3	1	Myrica nana A. Cheval.	0.5	70	0.7	8	leaf	88.3
YN052	1	1	Myrica nana A. Cheval.	0.5	73	0.6	3	root	66
YN052	2	1	Myrica nana A. Cheval.	0.5	71	0.8	5	root	71.3
YN052	3	1	Myrica nana A. Cheval.	0.5	70	0.7	8	root	67.1
YN052	1	1	Vaccinium bracteatum Thunb.	0.5	70	0.7	4	leaf	59.2
YN052	1	1	Vaccinium bracteatum Thunb.	0.5	70	0.7	4	stem	73.2
YN052	1	1	Vaccinium bracteatum Thunb.	0.5	70	0.7	4	root	66.3
YN053	1	1	Rhus chinensis Mill	0.5				leaf	39.4
YN053	1	1	Rhus chinensis Mill	0.5				stem	51.3
YN053	1	1	Rhus chinensis Mill	4	61	3.1	4	root	43.4
YN053	2	1	Litsea populifolia (Hemsl.) Gamble	4	72	3.4	3	leaf	52.3
YN053	1	1	Litsea populifolia (Hemsl.) Gamble	4	78	3.7	6	leaf	56.4
YN053	3	1	Litsea populifolia (Hemsl.) Gamble	4	75	3.8	5	leaf	64.9
YN053	2	1	Litsea populifolia (Hemsl.) Gamble	4	72	3.4	3	root	52.5
YN053	1	1	Litsea populifolia (Hemsl.) Gamble	4	78	3.7	6	root	54.6
YN053	3	1	Litsea populifolia (Hemsl.) Gamble	4	75	3.8	5	root	67.5
YN053	2	1	Litsea populifolia (Hemsl.) Gamble	4	72	3.4	3	stem	59.6
YN053	3	1	Litsea populifolia (Hemsl.) Gamble	4	75	3.8	5	stem	68.7
YN053	1	1	Litsea populifolia (Hemsl.) Gamble	4	78	3.7	6	stem	66.7
YN054	3	1	Desmodium yunnanense Franch	0.5	71	0.7	4	leaf	46.8
YN054	1	1	Desmodium yunnanense Franch	0.5	71	0.7	5	leaf	46.3
YN054	2	1	Desmodium yunnanense Franch	0.5	70	0.8	6	leaf	46.7
YN054	3	1	Desmodium yunnanense Franch	0.5	71	0.7	4	stem	58.2
YN054	1	1	Desmodium yunnanense Franch	0.5	71	0.7	5	stem	56.4
YN054	2	1	Desmodium yunnanense Franch	0.5	70	0.8	6	stem	66
YN054	1	1	Desmodium yunnanense Franch	0.5	71	0.7	5	root	46.2
YN054	3	1	Desmodium yunnanense Franch	0.5	71	0.7	4	root	53.6
YN054	2	1	Desmodium yunnanense Franch	0.5	70	0.8	6	root	59.4
YN054	1	1	Rhus chinensis Mill	2	64	1.8	5	leaf	48.6
YN054	1	1	Rhus chinensis Mill	2	64	1.8	5	root	45
YN054	1	1	Rhus chinensis Mill	2	64	1.8	5	stem	55.7
YN055	3	1	Rhus chinensis Mill	4	71	3.7	4	leaf	34.5
YN055	1	1	Rhus chinensis Mill	4	70	3.7	5	leaf	36
YN055	2	1	Rhus chinensis Mill	4	72	3.6	6	leaf	39.6
YN055	2	1	Rhus chinensis Mill	4	72	3.6	6	root	46.7
YN055	1	1	Rhus chinensis Mill	4	70	3.7	5	root	52.3
YN055	3	1	Rhus chinensis Mill	4	71	3.7	4	root	58.4
YN055	3	1	Rhus chinensis Mill	4	71	3.7	4	stem	69
YN055	1	1	Rhus chinensis Mill	4	70	3.7	5	stem	68.4
YN055	2	1	Rhus chinensis Mill	4	72	3.6	6	stem	70.8
YN056	3	1	Rhus chinensis Mill	4	73	3.4	5	leaf	43
YN056	1	1	Rhus chinensis Mill	4	72	3.3	6	leaf	45.1
YN056	2	1	Rhus chinensis Mill	4	74	3.2	8	leaf	41.3
YN056	3	1	Rhus chinensis Mill	4	73	3.4	5	root	43.2
YN056	2	1	Rhus chinensis Mill	4	74	3.2	8	root	50
YN056	1	1	Rhus chinensis Mill	4	72	3.3	6	stem	24
YN056	1	1	Rhus chinensis Mill	4	72	3.3	6	root	53.1
YN056	3	1	Rhus chinensis Mill	4	73	3.4	5	stem	59.1
YN056	2	1	Rhus chinensis Mill	4	74	3.2	8	stem	58.2
YN057	2	1	Rhus chinensis Mill	2	73	1.8	8	leaf	48.2
YN057	2	1	Rhus chinensis Mill	2	73	1.8	8	root	52.3
YN057	2	1	Rhus chinensis Mill	2	73	1.8	8	stem	64.4
YN057	1	1	Rhus chinensis Mill	4	75	2.2	5	leaf	51
YN057	3	1	Rhus chinensis Mill	4	76	2.3	4	leaf	53.4
YN057	3	1	Rhus chinensis Mill	4	76	2.3	4	root	51.8
YN057	1	1	Rhus chinensis Mill	4	75	2.2	5	root	52.3
YN057	3	1	Rhus chinensis Mill	4	76	2.3	4	stem	67.5
YN057	1	1	Rhus chinensis Mill	4	75	2.2	5	stem	64.4
YN058	2	1	Myrica nana A. Cheval.	1.5	73	1.2	5	leaf	61
YN058	3	1	Myrica nana A. Cheval.	1.5	74	1.3	6	leaf	64.2
YN058	1	1	Myrica nana A. Cheval.	1.5	75	1.3	8	leaf	66.3
YN058	2	1	Myrica nana A. Cheval.	1.5	73	1.2	5	stem	75.3
YN058	3	1	Myrica nana A. Cheval.	1.5	74	1.3	6	stem	72
YN058	1	1	Myrica nana A. Cheval.	1.5	75	1.3	8	stem	77.5
YN058	2	1	Myrica nana A. Cheval.	1.5	73	1.2	5	root	67.2
YN058	3	1	Myrica nana A. Cheval.	1.5	74	1.3	6	root	75.1
YN058	1	1	Myrica nana A. Cheval.	1.5	75	1.3	8	root	74.8
YN058	1	1	Vaccinium bracteatum Thunb.	1.5	70	1.4	5	leaf	62
YN058	1	1	Vaccinium bracteatum Thunb.	1.5	70	1.4	5	stem	66.3
YN058	1	1	Vaccinium bracteatum Thunb.	1.5	70	1.4	5	root	66.3
YN058	1	1	Lithocarpus glaber (Thunb.) Nakai	1.5	71	1.2	6	leaf	77.8
YN058	1	1	Lithocarpus glaber (Thunb.) Nakai	1.5	71	1.2	6	stem	77.6
YN058	1	1	Lithocarpus glaber (Thunb.) Nakai	1.5	71	1.2	6	root	72.7
YN059	3	1	Rhododendron delavayi Franch.	2	73	1.8	4	leaf	80.6
YN059	2	1	Rhododendron delavayi Franch.	2	72	1.9	5	leaf	72.2
YN059	1	1	Rhododendron delavayi Franch.	2	73	1.7	7	leaf	73.9
YN059	3	1	Rhododendron delavayi Franch.	2	73	1.8	4	root	67.4
YN059	2	1	Rhododendron delavayi Franch.	2	72	1.9	5	root	68.5
YN059	3	1	Rhododendron delavayi Franch.	2	73	1.8	4	stem	73.5
YN059	1	1	Rhododendron delavayi Franch.	2	73	1.7	7	root	67.2
YN059	2	1	Rhododendron delavayi Franch.	2	72	1.9	5	stem	68.3
YN059	1	1	Rhododendron delavayi Franch.	2	73	1.7	7	stem	73
YN059	1	1	Lithocarpus glaber (Thunb.) Nakai	2	57	1.8	5	leaf	83.5
YN059	1	1	Lithocarpus glaber (Thunb.) Nakai	2	57	1.8	5	root	82
YN059	1	1	Lithocarpus glaber (Thunb.) Nakai	2	57	1.8	5	stem	83.4
YN060	3	1	Castanea seguinii Dode	0.5	72	0.7	4	leaf	69
YN060	1	1	Castanea seguinii Dode	0.5	71	0.7	5	leaf	65.2
YN060	3	1	Castanea seguinii Dode	0.5	72	0.7	4	stem	81.2
YN060	1	1	Castanea seguinii Dode	0.5	71	0.7	5	stem	72.4
YN060	2	1	Castanea seguinii Dode	0.5	70	0.8	8	leaf	67.6
YN060	2	1	Castanea seguinii Dode	0.5	70	0.8	8	stem	79.5
YN060	3	1	Castanea seguinii Dode	0.5	72	0.7	4	root	59.5
YN060	1	1	Castanea seguinii Dode	0.5	71	0.7	5	root	59.8
YN060	2	1	Castanea seguinii Dode	0.5	70	0.8	8	root	60.4
YN060	1	1	Desmodium yunnanense Franch	0.5	71	0.6	4	leaf	23.4
YN060	1	1	Desmodium yunnanense Franch	0.5	71	0.6	4	stem	46.7
YN060	1	1	Desmodium yunnanense Franch	0.5	71	0.6	4	root	48.5
YN060	2	1	Quercus fabri Hance	3	73	3.6	4	leaf	62.2
YN060	3	1	Quercus fabri Hance	4	74	3.7	6	leaf	61.4
YN060	1	1	Quercus fabri Hance	4	72	3.5	5	leaf	67.2
YN060	2	1	Quercus fabri Hance	4	73	3.6	4	root	55
YN060	1	1	Quercus fabri Hance	4	72	3.5	5	root	53.3
YN060	3	1	Quercus fabri Hance	4	74	3.7	6	root	56.4
YN060	2	1	Quercus fabri Hance	4	73	3.6	4	stem	74.5
YN060	1	1	Quercus fabri Hance	4	72	3.5	5	stem	75.4
YN060	3	1	Quercus fabri Hance	4	74	3.7	6	stem	77.3
YN061	1	1	Corylus heterophylla Fisch	1.5	64	1.2	5	leaf	60.4
YN061	1	1	Corylus heterophylla Fisch	1.5	64	1.2	5	root	46.3
YN061	1	1	Corylus heterophylla Fisch	1.5	64	1.2	5	stem	90.5
YN061	3	1	Pyracantha fortuneana (Maxim.) Li	4	72	3.2	2	leaf	54.8
YN061	2	1	Pyracantha fortuneana (Maxim.) Li	4	73	3.2	4	leaf	57.6
YN061	1	1	Pyracantha fortuneana (Maxim.) Li	4	71	3.3	5	leaf	53.2
YN061	3	1	Pyracantha fortuneana (Maxim.) Li	4	72	3.2	2	stem	72.3
YN061	3	1	Pyracantha fortuneana (Maxim.) Li	4	72	3.2	2	root	75.5
YN061	2	1	Pyracantha fortuneana (Maxim.) Li	4	73	3.2	4	stem	67.5
YN061	2	1	Pyracantha fortuneana (Maxim.) Li	4	73	3.2	4	root	74.4
YN061	1	1	Pyracantha fortuneana (Maxim.) Li	4	71	3.3	5	stem	72.3
YN061	1	1	Pyracantha fortuneana (Maxim.) Li	4	71	3.3	5	root	75.7
YN061	3	1	Sageretia thea (Osbeck) Johnst.	4	63	2.8	1	leaf	71.4
YN061	2	1	Sageretia thea (Osbeck) Johnst.	4	63	2.9	2	leaf	50
YN061	1	1	Sageretia thea (Osbeck) Johnst.	4	64	3	3	leaf	45.3
YN061	3	1	Sageretia thea (Osbeck) Johnst.	4	63	2.8	1	stem	70.2
YN061	3	1	Sageretia thea (Osbeck) Johnst.	4	63	2.8	1	root	69.5
YN061	2	1	Sageretia thea (Osbeck) Johnst.	4	63	2.9	2	stem	79.4
YN061	2	1	Sageretia thea (Osbeck) Johnst.	4	63	2.9	2	root	61.1
YN061	1	1	Sageretia thea (Osbeck) Johnst.	4	64	3	3	stem	71.6
YN061	1	1	Sageretia thea (Osbeck) Johnst.	4	64	3	3	root	62.7
YN061	3	1	Rosa cymosa Tratt	4	69	3.2	3	leaf	59.4
YN061	2	1	Rosa cymosa Tratt	4	71	3.2	3	leaf	57.4
YN061	1	1	Rosa cymosa Tratt	4	70	3.1	4	leaf	53
YN061	3	1	Rosa cymosa Tratt	4	69	3.2	3	stem	75.8
YN061	2	1	Rosa cymosa Tratt	4	71	3.2	3	stem	73.2
YN061	3	1	Rosa cymosa Tratt	4	69	3.2	3	root	64.2
YN061	1	1	Rosa cymosa Tratt	4	70	3.1	4	root	58.3
YN061	2	1	Rosa cymosa Tratt	4	71	3.2	3	root	66.4
YN061	1	1	Rosa cymosa Tratt	4	70	3.1	4	stem	75.4
YN062	1	1	Vaccinium bracteatum Thunb.	1.5	58	3.1	4	leaf	61.3
YN062	1	1	Vaccinium bracteatum Thunb.	1.5	58	3.1	4	root	60.4
YN062	1	1	Vaccinium bracteatum Thunb.	1.5	58	3.1	4	stem	75.9
YN062	3	1	Quercus acutissima Carruth	4	72	4	4	leaf	76.6
YN062	1	1	Quercus acutissima Carruth	4	71	3.9	5	leaf	80.3
YN062	2	1	Quercus acutissima Carruth	4	70	4.1	6	leaf	79.5
YN062	1	1	Quercus acutissima Carruth	4	71	3.9	5	root	77.5
YN062	3	1	Quercus acutissima Carruth	4	72	4	4	root	82.8
YN062	2	1	Quercus acutissima Carruth	4	70	4.1	6	root	79.4
YN062	3	1	Quercus acutissima Carruth	4	72	4	4	stem	86.7
YN062	1	1	Quercus acutissima Carruth	4	71	3.9	5	stem	92.4
YN062	2	1	Quercus acutissima Carruth	4	70	4.1	6	stem	87.8
YN062	3	1	Quercus variabilis Bl	4	71	4.1	3	leaf	74.2
YN062	1	1	Quercus variabilis Bl	4	71	3.8	4	leaf	69.7
YN062	2	1	Quercus variabilis Bl	4	70	4	6	leaf	70.4
YN062	2	1	Quercus variabilis Bl	4	70	4	6	root	62.6
YN062	3	1	Quercus variabilis Bl	4	71	4.1	3	stem	80.2
YN062	1	1	Quercus variabilis Bl	4	71	3.8	4	root	74
YN062	1	1	Quercus variabilis Bl	4	71	3.8	4	stem	87.5
YN062	2	1	Quercus variabilis Bl	4	70	4	6	stem	80
YN062	3	1	Quercus variabilis Bl	4	71	4.1	3	root	86.6
YN063	1	1	Sophora davidii (Franch.) Skeels	1.5	67	1.2	3	leaf	39.6
YN063	3	1	Sophora davidii (Franch.) Skeels	1.5	64	1.2	4	leaf	44
YN063	2	1	Sophora davidii (Franch.) Skeels	1.5	66	1.3	5	leaf	46.7
YN063	1	1	Sophora davidii (Franch.) Skeels	1.5	67	1.2	3	root	73.4
YN063	2	1	Sophora davidii (Franch.) Skeels	1.5	66	1.3	5	root	71
YN063	3	1	Sophora davidii (Franch.) Skeels	1.5	64	1.2	4	root	78.5
YN063	1	1	Sophora davidii (Franch.) Skeels	1.5	67	1.2	3	stem	82.4
YN063	3	1	Sophora davidii (Franch.) Skeels	1.5	64	1.2	4	stem	86.3
YN063	2	1	Sophora davidii (Franch.) Skeels	1.5	66	1.3	5	stem	83.1
YN063	1	1	Dodonaea viscosa (L.) Jacq.	2	67	1.7	3	leaf	47.3
YN063	1	1	Dodonaea viscosa (L.) Jacq.	2	67	1.7	3	stem	87.9
YN063	1	1	Dodonaea viscosa (L.) Jacq.	2	67	1.7	3	root	92.4
YN063	3	1	Bauhinia brachycarpa	4	78	3.2	1	leaf	63.8
YN063	3	1	Bauhinia brachycarpa	4	78	3.2	1	stem	81.5
YN063	1	1	Bauhinia brachycarpa	4	76	3.3	4	leaf	66.3
YN063	2	1	Bauhinia brachycarpa	4	75	3.4	6	leaf	60.2
YN063	3	1	Bauhinia brachycarpa	4	78	3.2	1	root	77.4
YN063	1	1	Bauhinia brachycarpa	4	76	3.3	4	root	79.3
YN063	2	1	Bauhinia brachycarpa	4	75	3.4	6	root	74.5
YN063	2	1	Bauhinia brachycarpa	4	75	3.4	6	stem	75.5
YN063	1	1	Bauhinia brachycarpa	4	76	3.3	4	stem	84.5
YN064	1	1	Sophora davidii (Franch.) Skeels	1.5	70	1.7	3	leaf	46.4
YN064	1	1	Sophora davidii (Franch.) Skeels	1.5	70	1.7	3	stem	82.7
YN064	1	1	Sophora davidii (Franch.) Skeels	1.5	70	1.7	3	root	83.5
YN064	3	1	Zanthoxylum planispinum Sieb．Et Zucc	2.5	72	2.3	4	leaf	46.5
YN064	2	1	Zanthoxylum planispinum Sieb．Et Zucc	2.5	73	2.2	4	leaf	49.3
YN064	1	1	Zanthoxylum planispinum Sieb．Et Zucc	2.5	75	2.4	5	leaf	46.4
YN064	2	1	Zanthoxylum planispinum Sieb．Et Zucc	2.5	73	2.2	4	stem	50.3
YN064	3	1	Zanthoxylum planispinum Sieb．Et Zucc	2.5	72	2.3	4	stem	79.7
YN064	2	1	Zanthoxylum planispinum Sieb．Et Zucc	2.5	73	2.2	4	root	63.5
YN064	1	1	Zanthoxylum planispinum Sieb．Et Zucc	2.5	75	2.4	5	stem	75.6
YN064	1	1	Zanthoxylum planispinum Sieb．Et Zucc	2.5	75	2.4	5	root	64.3
YN064	3	1	Zanthoxylum planispinum Sieb．Et Zucc	2.5	72	2.3	4	root	79
YN065	2	1	Alchornea trewioides (Benth.) Muell. Arg.	2	67	1.6	3	leaf	39.4
YN065	1	1	Alchornea trewioides (Benth.) Muell. Arg.	2	68	1.7	4	leaf	37.2
YN065	3	1	Alchornea trewioides (Benth.) Muell. Arg.	2	69	1.7	5	leaf	50
YN065	2	1	Alchornea trewioides (Benth.) Muell. Arg.	2	67	1.6	3	stem	54.6
YN065	3	1	Alchornea trewioides (Benth.) Muell. Arg.	2	69	1.7	5	stem	47.3
YN065	1	1	Alchornea trewioides (Benth.) Muell. Arg.	2	68	1.7	4	stem	54.3
YN065	1	1	Alchornea trewioides (Benth.) Muell. Arg.	2	68	1.7	4	root	49.7
YN065	2	1	Alchornea trewioides (Benth.) Muell. Arg.	2	67	1.6	3	root	58.7
YN065	3	1	Alchornea trewioides (Benth.) Muell. Arg.	2	69	1.7	5	root	57.2
YN065	1	1	Melia azedarach L	2	64	1.6	4	leaf	49.3
YN065	1	1	Melia azedarach L	2	64	1.6	4	stem	56.4
YN065	1	1	Melia azedarach L	2	64	1.6	4	root	55.8
YN065	1	1	Cipadessa cinerasce-ns (Pell.) Hand.-Mazz.	4	74	3.5	4	leaf	39.2
YN065	3	1	Cipadessa cinerasce-ns (Pell.) Hand.-Mazz.	4	73	3.3	3	leaf	41.4
YN065	2	1	Cipadessa cinerasce-ns (Pell.) Hand.-Mazz.	4	73	3.4	6	leaf	41.5
YN065	3	1	Cipadessa cinerasce-ns (Pell.) Hand.-Mazz.	4	73	3.3	3	stem	56
YN065	3	1	Cipadessa cinerasce-ns (Pell.) Hand.-Mazz.	4	73	3.3	3	root	66.2
YN065	1	1	Cipadessa cinerasce-ns (Pell.) Hand.-Mazz.	4	74	3.5	4	root	55.4
YN065	1	1	Cipadessa cinerasce-ns (Pell.) Hand.-Mazz.	4	74	3.5	4	stem	54.3
YN065	2	1	Cipadessa cinerasce-ns (Pell.) Hand.-Mazz.	4	73	3.4	6	stem	58.4
YN065	2	1	Cipadessa cinerasce-ns (Pell.) Hand.-Mazz.	4	73	3.4	6	root	64.1
YN066	3	1	Rhodomyrtus tomentosa	0.5	78	0.7	4	leaf	64.7
YN066	1	1	Rhodomyrtus tomentosa	0.5	78	0.7	5	leaf	66.4
YN066	2	1	Rhodomyrtus tomentosa	0.5	79	0.8	6	leaf	68.5
YN066	3	1	Rhodomyrtus tomentosa	0.5	78	0.7	4	root	81
YN066	1	1	Rhodomyrtus tomentosa	0.5	78	0.7	5	root	75.3
YN066	2	1	Rhodomyrtus tomentosa	0.5	79	0.8	6	root	69.5
YN066	3	1	Rhodomyrtus tomentosa	0.5	78	0.7	4	stem	82.4
YN066	1	1	Rhodomyrtus tomentosa	0.5	78	0.7	5	stem	80.5
YN066	2	1	Rhodomyrtus tomentosa	0.5	79	0.8	6	stem	82.3
YN066	1	1	Macaranga denticulata (Bl.) Muell. Arg.	1.5	44	1.2	3	leaf	47.6
YN066	1	1	Macaranga denticulata (Bl.) Muell. Arg.	1.5	44	1.2	3	stem	51.4
YN066	1	1	Macaranga denticulata (Bl.) Muell. Arg.	1.5	44	1.2	3	root	73.9
YN067	2	1	Baeckea frutescens L.	0.5	80	0.9	7	leaf	71.7
YN067	3	1	Baeckea frutescens L.	0.5	81	0.7	7	leaf	77.4
YN067	1	1	Baeckea frutescens L.	0.5	81	0.8	8	leaf	71.4
YN067	2	1	Baeckea frutescens L.	0.5	80	0.9	7	stem	83.3
YN067	3	1	Baeckea frutescens L.	0.5	81	0.7	7	stem	85.7
YN067	1	1	Baeckea frutescens L.	0.5	81	0.8	8	stem	81.2
YN067	3	1	Baeckea frutescens L.	0.5	81	0.7	7	root	93
YN067	2	1	Baeckea frutescens L.	0.5	80	0.9	7	root	90.5
YN067	1	1	Baeckea frutescens L.	0.5	81	0.8	8	root	92.3
YN068	1	1	Myrica nana A. Cheval.	1.5	73	1.4	4	leaf	63.4
YN068	3	1	Myrica nana A. Cheval.	1.5	73	1.4	5	leaf	63.5
YN068	2	1	Myrica nana A. Cheval.	1.5	74	1.3	6	leaf	64.3
YN068	1	1	Myrica nana A. Cheval.	1.5	73	1.4	4	root	65.2
YN068	3	1	Myrica nana A. Cheval.	1.5	73	1.4	5	root	69.4
YN068	2	1	Myrica nana A. Cheval.	1.5	74	1.3	6	root	67.7
YN068	1	1	Myrica nana A. Cheval.	1.5	73	1.4	4	stem	72.3
YN068	3	1	Myrica nana A. Cheval.	1.5	73	1.4	5	stem	68.5
YN068	2	1	Myrica nana A. Cheval.	1.5	74	1.3	6	stem	70.4
YN068	1	1	Lithocarpus glaber (Thunb.) Nakai	1.5	72	1.4	4	leaf	72.2
YN068	1	1	Lithocarpus glaber (Thunb.) Nakai	1.5	72	1.4	4	root	69.3
YN068	1	1	Lithocarpus glaber (Thunb.) Nakai	1.5	72	1.4	4	stem	75.3
YN068	3	1	Vaccinium bracteatum Thunb.	1.5	64	1.4	1	leaf	60.5
YN068	3	1	Vaccinium bracteatum Thunb.	1.5	64	1.4	1	root	57.4
YN068	2	1	Vaccinium bracteatum Thunb.	1.5	65	1.2	3	leaf	62.3
YN068	3	1	Vaccinium bracteatum Thunb.	1.5	64	1.4	1	stem	69.7
YN068	1	1	Vaccinium bracteatum Thunb.	1.5	64	1.3	4	leaf	65.4
YN068	2	1	Vaccinium bracteatum Thunb.	1.5	65	1.2	3	root	65
YN068	1	1	Vaccinium bracteatum Thunb.	1.5	64	1.3	4	root	66.3
YN068	2	1	Vaccinium bracteatum Thunb.	1.5	65	1.2	3	stem	69.1
YN068	1	1	Vaccinium bracteatum Thunb.	1.5	64	1.3	4	stem	78.5
YN069	1	1	Prinsepia utilis Royle	1.5	68	1.3	3	leaf	43.7
YN069	1	1	Prinsepia utilis Royle	1.5	68	1.3	3	stem	64.9
YN069	1	1	Prinsepia utilis Royle	1.5	68	1.3	3	root	80.3
YN069	3	1	Zanthoxylum planispinum Sieb．Et Zucc	2	72	1.7	1	leaf	50.4
YN069	2	1	Zanthoxylum planispinum Sieb．Et Zucc	2	73	1.6	3	leaf	46
YN069	1	1	Zanthoxylum planispinum Sieb．Et Zucc	2	71	1.7	4	leaf	51.3
YN069	3	1	Zanthoxylum planispinum Sieb．Et Zucc	2	72	1.7	1	root	77.5
YN069	3	1	Zanthoxylum planispinum Sieb．Et Zucc	2	72	1.7	1	stem	72.5
YN069	1	1	Zanthoxylum planispinum Sieb．Et Zucc	2	71	1.7	4	root	64.9
YN069	2	1	Zanthoxylum planispinum Sieb．Et Zucc	2	73	1.6	3	root	84.6
YN069	2	1	Zanthoxylum planispinum Sieb．Et Zucc	2	73	1.6	3	stem	67.1
YN069	1	1	Zanthoxylum planispinum Sieb．Et Zucc	2	71	1.7	4	stem	74.4
YN070	1	1	Osyris lanceolata Hochst. & Steud.	1.5	67	1.1	2	leaf	67.8
YN070	1	1	Osyris lanceolata Hochst. & Steud.	1.5	67	1.1	2	root	72.9
YN070	1	1	Osyris lanceolata Hochst. & Steud.	1.5	67	1.1	2	stem	86.7
YN070	3	1	Zanthoxylum planispinum Sieb．Et Zucc	1.5	72	1.3	2	leaf	49
YN070	2	1	Zanthoxylum planispinum Sieb．Et Zucc	1.5	73	1.2	3	leaf	48.2
YN070	1	1	Zanthoxylum planispinum Sieb．Et Zucc	1.5	72	1.3	4	leaf	49.7
YN070	3	1	Zanthoxylum planispinum Sieb．Et Zucc	1.5	72	1.3	2	stem	80.5
YN070	3	1	Zanthoxylum planispinum Sieb．Et Zucc	1.5	72	1.3	2	root	84.8
YN070	2	1	Zanthoxylum planispinum Sieb．Et Zucc	1.5	73	1.2	3	root	76.3
YN070	1	1	Zanthoxylum planispinum Sieb．Et Zucc	1.5	72	1.3	4	root	66.4
YN070	2	1	Zanthoxylum planispinum Sieb．Et Zucc	1.5	73	1.2	3	stem	82.3
YN070	1	1	Zanthoxylum planispinum Sieb．Et Zucc	1.5	72	1.3	4	stem	83.1
YN071	1	1	[Loropetalum chinense (R. Br.) Oliver]	1.5	71	1.3	4	leaf	48
YN071	2	1	[Loropetalum chinense (R. Br.) Oliver]	1.5	70	1.4	5	leaf	50.8
YN071	3	1	[Loropetalum chinense (R. Br.) Oliver]	1.5	71	1.4	4	leaf	56.6
YN071	1	1	[Loropetalum chinense (R. Br.) Oliver]	1.5	71	1.3	4	stem	61.2
YN071	3	1	[Loropetalum chinense (R. Br.) Oliver]	1.5	71	1.4	4	stem	64.7
YN071	1	1	[Loropetalum chinense (R. Br.) Oliver]	1.5	71	1.3	4	root	74.1
YN071	2	1	[Loropetalum chinense (R. Br.) Oliver]	1.5	70	1.4	5	stem	65.6
YN071	3	1	[Loropetalum chinense (R. Br.) Oliver]	1.5	71	1.4	4	root	81.1
YN071	2	1	[Loropetalum chinense (R. Br.) Oliver]	1.5	70	1.4	5	root	80.4
YN071	1	1	Quercus guyavifolia	2	68	1.7	3	leaf	82.9
YN071	1	1	Quercus guyavifolia	2	68	1.7	3	root	78.4
YN071	1	1	Quercus guyavifolia	2	68	1.7	3	stem	71.2
YN072	3	1	Rhododendron fastigiatum Franch	0.5	79	0.3	4	leaf	58.3
YN072	1	1	Rhododendron fastigiatum Franch	0.5	81	0.3	6	leaf	56.4
YN072	2	1	Rhododendron fastigiatum Franch	0.5	80	0.4	7	leaf	57.8
YN072	3	1	Rhododendron fastigiatum Franch	0.5	79	0.3	4	stem	83.6
YN072	3	1	Rhododendron fastigiatum Franch	0.5	79	0.3	4	root	68.5
YN072	1	1	Rhododendron fastigiatum Franch	0.5	81	0.3	6	root	69.4
YN072	1	1	Rhododendron fastigiatum Franch	0.5	81	0.3	6	stem	82.3
YN072	2	1	Rhododendron fastigiatum Franch	0.5	80	0.4	7	root	67.6
YN072	2	1	Rhododendron fastigiatum Franch	0.5	80	0.4	7	stem	81
YN073	1	1	Quercus monimotricha	0.5	71	0.7	4	leaf	67.2
YN073	1	1	Quercus monimotricha	0.5	71	0.7	4	root	89.6
YN073	1	1	Quercus monimotricha	0.5	71	0.7	4	stem	86.5
YN073	3	1	Rhododendron adenogynum Diels	0.5	70	0.6	5	leaf	61.7
YN073	1	1	Rhododendron adenogynum Diels	0.5	72	0.6	5	leaf	58.4
YN073	2	1	Rhododendron adenogynum Diels	0.5	71	0.5	6	leaf	58.4
YN073	3	1	Rhododendron adenogynum Diels	0.5	70	0.6	5	root	75.7
YN073	2	1	Rhododendron adenogynum Diels	0.5	71	0.5	6	root	76.5
YN073	1	1	Rhododendron adenogynum Diels	0.5	72	0.6	5	root	78.4
YN073	3	1	Rhododendron adenogynum Diels	0.5	70	0.6	5	stem	80
YN073	2	1	Rhododendron adenogynum Diels	0.5	71	0.5	6	stem	73.6
YN073	1	1	Rhododendron adenogynum Diels	0.5	72	0.6	5	stem	80.3
YN074	1	1	Quercus monimotricha	0.5	71	0.6	5	leaf	69.9
YN074	1	1	Quercus monimotricha	0.5	71	0.6	5	root	74.5
YN074	1	1	Quercus monimotricha	0.5	71	0.6	5	stem	88
YN074	3	1	Rhododendron adenogynum Diels	0.5	72	0.6	4	leaf	51.3
YN074	1	1	Rhododendron adenogynum Diels	0.5	71	0.6	7	leaf	45.6
YN074	2	1	Rhododendron adenogynum Diels	0.5	72	0.5	6	leaf	50.5
YN074	3	1	Rhododendron adenogynum Diels	0.5	72	0.6	4	stem	77.4
YN074	2	1	Rhododendron adenogynum Diels	0.5	72	0.5	6	root	64.3
YN074	3	1	Rhododendron adenogynum Diels	0.5	72	0.6	4	root	83.3
YN074	1	1	Rhododendron adenogynum Diels	0.5	71	0.6	7	root	72.3
YN074	2	1	Rhododendron adenogynum Diels	0.5	72	0.5	6	stem	72.2
YN074	1	1	Rhododendron adenogynum Diels	0.5	71	0.6	7	stem	79.5
YN075	3	1	Rhododendron adenogynum Diels	0.5	72	0.6	4	leaf	55
YN075	1	1	Rhododendron adenogynum Diels	0.5	73	0.6	5	leaf	60.7
YN075	2	1	Rhododendron adenogynum Diels	0.5	72	0.5	7	leaf	61.4
YN075	3	1	Rhododendron adenogynum Diels	0.5	72	0.6	4	root	69.7
YN075	1	1	Rhododendron adenogynum Diels	0.5	73	0.6	5	root	67.6
YN075	2	1	Rhododendron adenogynum Diels	0.5	72	0.5	7	root	69.2
YN075	2	1	Rhododendron adenogynum Diels	0.5	72	0.5	7	stem	82.4
YN075	3	1	Rhododendron adenogynum Diels	0.5	72	0.6	4	stem	82.8
YN075	1	1	Rhododendron adenogynum Diels	0.5	73	0.6	5	stem	78.3
YN075	1	1	Quercus monimotricha	1.5	73	1.3	4	leaf	73.3
YN075	1	1	Quercus monimotricha	1.5	73	1.3	4	root	68.9
YN075	1	1	Quercus monimotricha	1.5	73	1.3	4	stem	83.2
YN076	2	1	Rhododendron nivale Hook. f.	0.5	77	0.7	4	leaf	54.8
YN076	1	1	Rhododendron nivale Hook. f.	0.5	78	0.6	6	leaf	61.5
YN076	3	1	Rhododendron nivale Hook. f.	0.5	78	0.6	7	leaf	62.1
YN076	1	1	Rhododendron nivale Hook. f.	0.5	78	0.6	6	root	66.7
YN076	2	1	Rhododendron nivale Hook. f.	0.5	77	0.7	4	root	76.4
YN076	2	1	Rhododendron nivale Hook. f.	0.5	77	0.7	4	stem	86.7
YN076	3	1	Rhododendron nivale Hook. f.	0.5	78	0.6	7	root	75.3
YN076	3	1	Rhododendron nivale Hook. f.	0.5	78	0.6	7	stem	84.2
YN076	1	1	Rhododendron nivale Hook. f.	0.5	78	0.6	6	stem	85
YN076	2	1	Rhododendron anthopogon D. Don	1.5	72	1.2	4	leaf	60.4
YN076	1	1	Rhododendron anthopogon D. Don	1.5	71	1.3	5	leaf	54.7
YN076	3	1	Rhododendron anthopogon D. Don	1.5	71	1.3	5	leaf	62.3
YN076	2	1	Rhododendron anthopogon D. Don	1.5	72	1.2	4	root	65.6
YN076	2	1	Rhododendron anthopogon D. Don	1.5	72	1.2	4	stem	70.2
YN076	3	1	Rhododendron anthopogon D. Don	1.5	71	1.3	5	root	68.7
YN076	1	1	Rhododendron anthopogon D. Don	1.5	71	1.3	5	stem	72.4
YN076	3	1	Rhododendron anthopogon D. Don	1.5	71	1.3	5	stem	71.5
YN076	1	1	Rhododendron anthopogon D. Don	1.5	71	1.3	5	root	80.3
YN077	1	1	Vaccinium bracteatum Thunb.	0.5	62	0.8	4	leaf	61.7
YN077	1	1	Vaccinium bracteatum Thunb.	0.5	62	0.8	4	root	74.3
YN077	1	1	Vaccinium bracteatum Thunb.	0.5	62	0.8	4	stem	70.2
YN077	2	1	Rhododendron adenogynum Diels	0.5	71	0.7	3	leaf	63.4
YN077	3	1	Rhododendron adenogynum Diels	0.5	72	0.6	4	leaf	66.6
YN077	1	1	Rhododendron adenogynum Diels	0.5	72	0.6	6	leaf	67.5
YN077	2	1	Rhododendron adenogynum Diels	0.5	71	0.7	3	root	79
YN077	2	1	Rhododendron adenogynum Diels	0.5	71	0.7	3	stem	82.7
YN077	3	1	Rhododendron adenogynum Diels	0.5	72	0.6	4	root	72.3
YN077	3	1	Rhododendron adenogynum Diels	0.5	72	0.6	4	stem	76.5
YN077	1	1	Rhododendron adenogynum Diels	0.5	72	0.6	6	root	68.4
YN077	1	1	Rhododendron adenogynum Diels	0.5	72	0.6	6	stem	77.7
YN078	1	1	Desmodium yunnanense Franch	0.5	48	0.7	3	leaf	43.3
YN078	1	1	Desmodium yunnanense Franch	0.5	48	0.7	3	stem	58.5
YN078	1	1	Desmodium yunnanense Franch	0.5	48	0.7	3	root	61.7
YN078	2	1	Rhododendron adenogynum Diels	1.5	72	1.2	3	leaf	55.6
YN078	1	1	Rhododendron adenogynum Diels	1.5	70	1.3	4	leaf	59.6
YN078	3	1	Rhododendron adenogynum Diels	1.5	71	1.2	6	leaf	60
YN078	2	1	Rhododendron adenogynum Diels	1.5	72	1.2	3	root	74.5
YN078	1	1	Rhododendron adenogynum Diels	1.5	70	1.3	4	root	73.3
YN078	1	1	Rhododendron adenogynum Diels	1.5	70	1.3	4	stem	75.7
YN078	2	1	Rhododendron adenogynum Diels	1.5	72	1.2	3	stem	84.4
YN078	3	1	Rhododendron adenogynum Diels	1.5	71	1.2	6	root	81.7
YN078	3	1	Rhododendron adenogynum Diels	1.5	71	1.2	6	stem	79.4
YN079	2	1	Rhododendron rufum Batalin	0.5	67	0.6	3	leaf	64.1
YN079	1	1	Rhododendron rufum Batalin	0.5	68	0.7	4	leaf	68.6
YN079	3	1	Rhododendron rufum Batalin	0.5	68	0.6	5	leaf	65.6
YN079	2	1	Rhododendron rufum Batalin	0.5	67	0.6	3	root	69.8
YN079	1	1	Rhododendron rufum Batalin	0.5	68	0.7	4	root	72.1
YN079	2	1	Rhododendron rufum Batalin	0.5	67	0.6	3	stem	74.3
YN079	3	1	Rhododendron rufum Batalin	0.5	68	0.6	5	root	69.2
YN079	1	1	Rhododendron rufum Batalin	0.5	68	0.7	4	stem	69.2
YN079	3	1	Rhododendron rufum Batalin	0.5	68	0.6	5	stem	70.5
YN079	2	1	Rhododendron przewalskii Maxim.	2.5	71	2.3	4	leaf	76.4
YN079	1	1	Rhododendron przewalskii Maxim.	2.5	69	2.4	5	leaf	74.7
YN079	3	1	Rhododendron przewalskii Maxim.	2.5	70	2.4	6	leaf	75.6
YN079	2	1	Rhododendron przewalskii Maxim.	2.5	71	2.3	4	root	81.6
YN079	1	1	Rhododendron przewalskii Maxim.	2.5	69	2.4	5	root	73.2
YN079	3	1	Rhododendron przewalskii Maxim.	2.5	70	2.4	6	root	75.6
YN079	2	1	Rhododendron przewalskii Maxim.	2.5	71	2.3	4	stem	77.7
YN079	1	1	Rhododendron przewalskii Maxim.	2.5	69	2.4	5	stem	75.4
YN079	3	1	Rhododendron przewalskii Maxim.	2.5	70	2.4	6	stem	77.5
YN080	1	1	Lithocarpus glaber (Thunb.) Nakai	1.5	64	1.3	3	leaf	78.8
YN080	1	1	Lithocarpus glaber (Thunb.) Nakai	1.5	64	1.3	3	root	83
YN080	1	1	Lithocarpus glaber (Thunb.) Nakai	1.5	64	1.3	3	stem	86.1
YN080	3	1	Rhododendron adenogynum Diels	2.5	76	2.5	4	leaf	63.4
YN080	1	1	Rhododendron adenogynum Diels	2.5	75	2.4	4	leaf	61.7
YN080	2	1	Rhododendron adenogynum Diels	2.5	76	22.5	6	leaf	62.5
YN080	1	1	Rhododendron adenogynum Diels	2.5	75	2.4	4	stem	65.3
YN080	3	1	Rhododendron adenogynum Diels	2.5	76	2.5	4	stem	74.5
YN080	3	1	Rhododendron adenogynum Diels	2.5	76	2.5	4	root	83.3
YN080	1	1	Rhododendron adenogynum Diels	2.5	75	2.4	4	root	83.4
YN080	2	1	Rhododendron adenogynum Diels	2.5	76	22.5	6	stem	71.2
YN080	2	1	Rhododendron adenogynum Diels	2.5	76	22.5	6	root	83
YN081	3	1	Opuntia stricta (Haw.) Haw. var. dillenii (Ker-Gawl.) Benson	0.5	76	0.8	3	stem	14.5
YN081	3	1	Opuntia stricta (Haw.) Haw. var. dillenii (Ker-Gawl.) Benson	0.5	76	0.8	3	root	30.2
YN081	1	1	Opuntia stricta (Haw.) Haw. var. dillenii (Ker-Gawl.) Benson	0.5	79	0.8	4	root	27.1
YN081	2	1	Opuntia stricta (Haw.) Haw. var. dillenii (Ker-Gawl.) Benson	0.5	80	0.7	5	root	26.4
YN081	1	1	Opuntia stricta (Haw.) Haw. var. dillenii (Ker-Gawl.) Benson	0.5	79	0.8	4	stem	21.2
YN081	2	1	Opuntia stricta (Haw.) Haw. var. dillenii (Ker-Gawl.) Benson	0.5	80	0.7	5	stem	14.3
YN081	1	1	Dodonaea viscosa (L.) Jacq.	1.5	68	1.4	4	leaf	44.8
YN081	1	1	Dodonaea viscosa (L.) Jacq.	1.5	68	1.4	4	root	82.3
YN081	1	1	Dodonaea viscosa (L.) Jacq.	1.5	68	1.4	4	stem	84.5
YN081	2	1	Acacia farnesiana (Linn.) Willd	4	64	3.5	1	leaf	53.3
YN081	3	1	Acacia farnesiana (Linn.) Willd	4	66	3.6	2	leaf	54.1
YN081	1	1	Acacia farnesiana (Linn.) Willd	4	66	3.6	2	leaf	65.4
YN081	2	1	Acacia farnesiana (Linn.) Willd	4	64	3.5	1	root	68.8
YN081	2	1	Acacia farnesiana (Linn.) Willd	4	64	3.5	1	stem	73
YN081	3	1	Acacia farnesiana (Linn.) Willd	4	66	3.6	2	root	64.7
YN081	1	1	Acacia farnesiana (Linn.) Willd	4	66	3.6	2	root	71
YN081	3	1	Acacia farnesiana (Linn.) Willd	4	66	3.6	2	stem	75.2
YN081	1	1	Acacia farnesiana (Linn.) Willd	4	66	3.6	2	stem	70.3
YN082	1	1	Hypericum monogynum L.	0.5	64	0.7	3	leaf	45.5
YN082	1	1	Hypericum monogynum L.	0.5	64	0.7	3	root	64
YN082	1	1	Hypericum monogynum L.	0.5	64	0.7	3	stem	83.2
YN082	3	1	Rhododendron flavidum Franch.	2	73	1.7	2	leaf	58.3
YN082	2	1	Rhododendron flavidum Franch.	2	74	1.5	3	leaf	66.1
YN082	1	1	Rhododendron flavidum Franch.	2	73	1.6	5	leaf	70
YN082	3	1	Rhododendron flavidum Franch.	2	73	1.7	2	root	73.4
YN082	3	1	Rhododendron flavidum Franch.	2	73	1.7	2	stem	72.1
YN082	2	1	Rhododendron flavidum Franch.	2	74	1.5	3	root	73.7
YN082	1	1	Rhododendron flavidum Franch.	2	73	1.6	5	root	75.1
YN082	2	1	Rhododendron flavidum Franch.	2	74	1.5	3	stem	83.2
YN082	1	1	Rhododendron flavidum Franch.	2	73	1.6	5	stem	83.2

## Sheet: Herb layer biomass
Herb biomass
Sample code	plot number	harvest area	species	coverage	max height	average height	min height	number of plant clusters	organ	Sample dry weight
YN001	1	1	Bothriochloa pertusa	40	0.25	0.1	0.05	50	Under-ground	63.6
YN001	1	1	Bothriochloa pertusa	40	0.25	0.1	0.05	50	above-ground	58.7
YN001	2	1	Bothriochloa pertusa	20	0.2	0.1	0.05	30	Under-ground	64.5
YN001	2	1	Bothriochloa pertusa	20	0.2	0.1	0.05	30	above-ground	52.4
YN001	3	1	Bothriochloa pertusa	10	0.2	0.15	0.07	20	above-ground	47.3
YN001	3	1	Bothriochloa pertusa	10	0.2	0.15	0.07	20	Under-ground	52.2
YN003	1	1	Diphasiastrum Holub	4	0.24	0.1	0.07	21	above-ground	52.6
YN003	1	1	Diphasiastrum Holub	4	0.24	0.1	0.07	21	Under-ground	34.6
YN003	2	1	Oryzopsis munroi Stapf ex Hook. f.	2	0.45	0.3	0.12	7	above-ground	33.3
YN003	2	1	Oryzopsis munroi Stapf ex Hook. f.	2	0.45	0.3	0.12	7	Under-ground	39.4
YN004	1	1	others	17	0.28	0.2	0.1	4	Under-ground	68.2
YN004	1	1	others	17	0.28	0.2	0.1	4	above-ground	52.1
YN004	2	1	Eulaliopsis binata (Retz.) C. E. Hubb.	32	32	21	14	16	Under-ground	64.4
YN004	2	1	Eulaliopsis binata (Retz.) C. E. Hubb.	32	32	21	14	16	above-ground	61
YN004	3	1	Eulaliopsis binata (Retz.) C. E. Hubb.	40	0.4	0.35	0.15	18	Under-ground	50.3
YN004	3	1	Eulaliopsis binata (Retz.) C. E. Hubb.	40	0.4	0.35	0.15	18	above-ground	61.6
YN005	1	1	Themeda japonica (Willd. ) Tanaka	7	0.12	0.07	0.04	17	Under-ground	66.2
YN005	1	1	Themeda japonica (Willd. ) Tanaka	7	0.12	0.07	0.04	17	above-ground	70
YN005	2	1	Themeda japonica (Willd. ) Tanaka	4	0.11	0.06	0.04	12	Under-ground	68.6
YN005	2	1	Themeda japonica (Willd. ) Tanaka	4	0.11	0.06	0.04	12	above-ground	71.8
YN005	3	1	Themeda japonica (Willd. ) Tanaka	35	0.27	0.11	0.05	33	Under-ground	69
YN005	3	1	Themeda japonica (Willd. ) Tanaka	35	0.27	0.11	0.05	33	above-ground	48.9
YN006	3	1	PhymatopsisintegrifoliaChing	3		0.3	0.1	8	Under-ground	42.7
YN006	3	1	PhymatopsisintegrifoliaChing	2		0.3	0.1	8	above-ground	15.7
YN007	1	1	Themeda japonica (Willd. ) Tanaka	75		0.4	0.2	10	above-ground	59.3
YN007	1	1	Themeda japonica (Willd. ) Tanaka	76		0.4	0.2	10	Under-ground	62.2
YN007	2	1	Themeda japonica (Willd. ) Tanaka	67	0.43	0.3	0.17	8	above-ground	51.7
YN007	2	1	Themeda japonica (Willd. ) Tanaka	67	0.43	0.3	0.17	8	Under-ground	68.6
YN007	3	1	Themeda japonica (Willd. ) Tanaka	70	0.4	0.27	0.12	9	above-ground	52
YN007	3	1	Themeda japonica (Willd. ) Tanaka	70	0.4	0.27	0.12	9	Under-ground	35
YN008	1	1	Ageratina adenophora（Spreng.）R.M. King et H.Rob.	41		0.43	0.21	4	above-ground	29.7
YN008	1	1	Ageratina adenophora（Spreng.）R.M. King et H.Rob.	42		0.43	0.21	4	Under-ground	41.5
YN008	2	1	Ageratina adenophora（Spreng.）R.M. King et H.Rob.	43	0.58	0.37	0.15	3	above-ground	19.2
YN008	2	1	Ageratina adenophora（Spreng.）R.M. King et H.Rob.	43	0.58	0.37	0.15	3	Under-ground	39
YN008	3	1	Ageratina adenophora（Spreng.）R.M. King et H.Rob.	45	0.6	0.35	0.14	5	above-ground	22.3
YN008	3	1	Ageratina adenophora（Spreng.）R.M. King et H.Rob.	45	0.6	0.35	0.14	5	Under-ground	45.3
YN009	1	1	Capillipedium assimile (Steud.) A. Camus	60	0.5	0.44	0.12	50	above-ground	57
YN009	1	1	Capillipedium assimile (Steud.) A. Camus	60	0.5	0.44	0.12	50	Under-ground	62.4
YN010	2	1	Bothriochloa pertusa	2	0.05	0.02	0.01	10	above-ground	74.4
YN010	2	1	Bothriochloa pertusa	2	0.05	0.02	0.01	10	Under-ground	84
YN011	3	1	Scutellaria baicalensis Georgi	30	0.42	0.3	0.13	30	above-ground	81.1
YN011	3	1	Scutellaria baicalensis Georgi	30	0.42	0.3	0.13	30	Under-ground	13.8
YN012	1	1	Allium mairei Levl.	3	0.05	0.04	0.01	30	Under-ground	13.9
YN012	1	1	Allium mairei Levl.	3	0.05	0.04	0.01	30	above-ground	11.9
YN013	2	1	Eriocaulon buergerianum	5	0.18	0.06	0.02	6	above-ground	50.1
YN013	2	1	Eriocaulon buergerianum	5	0.18	0.06	0.02	6	Under-ground	60.2
YN014	1	1	Eleusine indica (L.) Gaertn.	30	0.03	0.02	0.01	60	Under-ground	73.7
YN014	1	1	Eleusine indica (L.) Gaertn.	30	0.03	0.02	0.01	60	above-ground	50.3
YN014	2	1	Eleusine indica (L.) Gaertn.	30	0.03	0.02	0.01	60	Under-ground	62.1
YN014	2	1	Eleusine indica (L.) Gaertn.	30	0.03	0.02	0.01	60	above-ground	47
YN015	1	1	Eleusine indica (L.) Gaertn.	10	0.32	0.28	0.08	15	above-ground	42.7
YN015	1	1	Eleusine indica (L.) Gaertn.	10	0.32	0.28	0.08	15	Under-ground	78.1
YN015	2	1	Themeda japonica (Willd. ) Tanaka	8	0.38	0.12	0.03	3	above-ground	61.1
YN015	2	1	Themeda japonica (Willd. ) Tanaka	8	0.38	0.12	0.03	3	Under-ground	55.3
YN015	3	1	Eleusine indica (L.) Gaertn.	3	0.1	0.08	0.03	5	above-ground	42.7
YN015	3	1	Eleusine indica (L.) Gaertn.	3	0.1	0.08	0.03	5	Under-ground	53.1
YN016	1	1	Eriocaulon buergerianum	10	0.33	0.28	0.08	8	Under-ground	72.5
YN016	1	1	Eriocaulon buergerianum	10	0.33	0.28	0.08	8	above-ground	54.6
YN016	2	1	Ageratina adenophora（Spreng.）R.M. King et H.Rob.	12	1.2	1.1	0.8	3	Under-ground	52.4
YN016	2	1	Ageratina adenophora（Spreng.）R.M. King et H.Rob.	12	1.2	1.1	0.8	3	above-ground	29.8
YN016	3	1	Eriocaulon buergerianum	15	0.32	0.21	0.05		above-ground	48.4
YN016	3	1	Eriocaulon buergerianum	15	0.32	0.21	0.05		Under-ground	39
YN017	1	1	Themeda japonica (Willd. ) Tanaka	10	0.23	0.12	0.08	30	above-ground	65
YN017	1	1	Themeda japonica (Willd. ) Tanaka	10	0.23	0.12	0.08	30	Under-ground	80.6
YN018	3	1	Bulbostylis densa (Wall ) Hand Mazz.	15	0.12	0.07	0.05	5	Under-ground	55.5
YN018	3	1	Bulbostylis densa (Wall ) Hand Mazz.	15	0.12	0.07	0.05	5	above-ground	58.4
YN019	1	1	Filipendula Palmata	15	0.04	0.02	0.01	15	Under-ground	96.5
YN019	1	1	Filipendula Palmata	15	0.04	0.02	0.01	15	above-ground	52.2
YN019	2	1	Eriocaulon buergerianum	20	0.04	0.03	0.11	28	Under-ground	68.3
YN019	2	1	Eriocaulon buergerianum	20	0.04	0.03	0.11	28	above-ground	40.2
YN019	3	1	Ainsliaea yunnanensis Franch.	18	0.08	0.02	0.01	30	Under-ground	44.8
YN019	3	1	Ainsliaea yunnanensis Franch.	18	0.08	0.02	0.01	30	above-ground	30.3
YN020	1	1	Ainsliaea yunnanensis Franch.	80	0.13	0.1	0.05	80	Under-ground	46.9
YN020	1	1	Ainsliaea yunnanensis Franch.	80	0.13	0.1	0.05	80	above-ground	21.3
YN020	2	1	Ainsliaea yunnanensis Franch.	15	0.15	0.09	0.04	31	Under-ground	39.4
YN020	2	1	Ainsliaea yunnanensis Franch.	15	0.15	0.09	0.04	31	above-ground	32.4
YN020	3	1	Oryzopsis munroi Stapf ex Hook. f.	48	0.35	0.2	0.1	29	Under-ground	55.4
YN020	3	1	Oryzopsis munroi Stapf ex Hook. f.	48	0.35	0.2	0.1	29	above-ground	61.6
YN021	1	1	Capillipedium assimile (Steud.) A. Camus	15	1.2	0.8	0.27	8	above-ground	55.7
YN021	1	1	Capillipedium assimile (Steud.) A. Camus	15	1.2	0.8	0.27	8	Under-ground	58.4
YN021	2	1	Capillipedium assimile (Steud.) A. Camus	11	1.25	0.79	0.41	6	above-ground	40.2
YN021	2	1	Capillipedium assimile (Steud.) A. Camus	11	1.25	0.79	0.41	6	Under-ground	63.6
YN021	3	1	Capillipedium assimile (Steud.) A. Camus	21	1.34	0.85	0.44	8	above-ground	75.8
YN021	3	1	Capillipedium assimile (Steud.) A. Camus	21	1.34	0.85	0.44	8	Under-ground	59
YN022	1	1	Eulaliopsis binata (Retz.) C. E. Hubb.	10	0.4	0.32	0.15	4	Under-ground	46.8
YN022	1	1	Eulaliopsis binata (Retz.) C. E. Hubb.	10	0.4	0.32	0.15	4	above-ground	71.9
YN022	2	1	Crotalaria albida Heyne ex Roth	5	0.05	0.03	0.02	5	Under-ground	54.7
YN022	2	1	Crotalaria albida Heyne ex Roth	5	0.05	0.03	0.02	5	above-ground	38.9
YN023	1	1	Artemisia carvifolia Buch.-Ham. ex Roxb. Hort. Beng.	13	0.9	0.8	0.62	3	above-ground	38.1
YN023	1	1	Artemisia carvifolia Buch.-Ham. ex Roxb. Hort. Beng.	13	0.9	0.8	0.62	3	Under-ground	50.3
YN023	2	1	Ageratina adenophora（Spreng.）R.M. King et H.Rob.	20	0.81	0.76	0.65	4	above-ground	25.7
YN023	2	1	Ageratina adenophora（Spreng.）R.M. King et H.Rob.	20	0.81	0.76	0.65	4	Under-ground	49.8
YN023	3	1	Lespedeza cuneata (Dum. -Cours.) G. Don	21	0.12	0.08	0.04	10	above-ground	54.3
YN023	3	1	Lespedeza cuneata (Dum. -Cours.) G. Don	21	0.12	0.08	0.04	10	Under-ground	54.2
YN024	2	1	Elsholtzia bodinieri Vant.	10	0.13	0.04	0.01	15	above-ground	43
YN024	2	1	Elsholtzia bodinieri Vant.	10	0.13	0.04	0.01	15	Under-ground	48.4
YN025	1	1	Crotalaria albida Heyne ex Roth	10	0.13	0.08	0.03	8	Under-ground	47.1
YN025	1	1	Crotalaria albida Heyne ex Roth	10	0.13	0.08	0.03	8	above-ground	11.8
YN025	2	1	Ageratina adenophora（Spreng.）R.M. King et H.Rob.	15	1.2	0.93	0.07	4	above-ground	38.6
YN025	2	1	Ageratina adenophora（Spreng.）R.M. King et H.Rob.	15	1.2	0.93	0.07	4	Under-ground	55.4
YN026	1	1	Mariscus sumatrensis (Retz) T. Koyama	40	0.22	0.18	0.05	28	Under-ground	65.8
YN026	1	1	Mariscus sumatrensis (Retz) T. Koyama	40	0.22	0.18	0.05	28	above-ground	50.2
YN026	2	1	Ageratina adenophora（Spreng.）R.M. King et H.Rob.	15	1.7	1.3	0.13	5	above-ground	53.5
YN026	2	1	Ageratina adenophora（Spreng.）R.M. King et H.Rob.	15	1.7	1.3	0.13	5	Under-ground	52.9
YN027	1	1	Eriocaulon buergerianum	15	0.24	0.1	0.03	9	Under-ground	61
YN027	1	1	Eriocaulon buergerianum	15	0.24	0.1	0.03	9	above-ground	36.1
YN027	2	1	Eriocaulon buergerianum	18	0.23	0.14	0.08	10	Under-ground	71.7
YN027	2	1	Eriocaulon buergerianum	18	0.23	0.14	0.08	10	above-ground	52.9
YN027	3	1	Bulbostylis densa (Wall ) Hand Mazz.	25	0.28	0.22	0.12	4	above-ground	58.4
YN027	3	1	Bulbostylis densa (Wall ) Hand Mazz.	25	0.28	0.22	0.12	4	Under-ground	53.7
YN028	1	1	Leontopodium leontopodioides (Willd. ) Beauv.	4	0.73	0.63	0.3	28	above-ground	48.5
YN028	1	1	Leontopodium leontopodioides (Willd. ) Beauv.	4	0.73	0.63	0.3	28	Under-ground	39.6
YN028	2	1	Cyperus rotundus L.	15	0.72	0.63	0.18	5	Under-ground	70.2
YN028	2	1	Cyperus rotundus L.	15	0.72	0.63	0.18	5	above-ground	59.5
YN028	3	1	Artemisia carvifolia Buch.-Ham. ex Roxb. Hort. Beng.	15	0.83	0.72	0.54	8	above-ground	59.5
YN028	3	1	Artemisia carvifolia Buch.-Ham. ex Roxb. Hort. Beng.	15	0.83	0.72	0.54	8	Under-ground	47.7
YN029	1	1	AgrimoniapilosaLedeb.	13	0.43	0.25	0.08	14	Under-ground	45.1
YN029	1	1	AgrimoniapilosaLedeb.	13	0.43	0.25	0.08	14	above-ground	49.5
YN029	2	1	Pteridium aquilinum (L.) Kuhn var. latiusculum (Desv.) Underw.ex Heller	10	0.93	0.87	0.81	3	above-ground	55.8
YN029	2	1	Pteridium aquilinum (L.) Kuhn var. latiusculum (Desv.) Underw.ex Heller	10	0.93	0.87	0.81	3	Under-ground	61.4
YN030	1	1	Arundinella anomala Steud.	30	0.4	0.3	0.2	5	above-ground	72.8
YN030	1	1	Arundinella anomala Steud.	30	0.4	0.3	0.2	5	Under-ground	60.7
YN030	2	1	Arundinella anomala Steud.	15	0.45	0.4	0.2	5	above-ground	47.8
YN030	2	1	Arundinella anomala Steud.	15	0.45	0.4	0.2	5	Under-ground	53.1
YN030	3	1	Arundinella anomala Steud.	27	0.5	0.35	0.2	8	Under-ground	75.5
YN030	3	1	Arundinella anomala Steud.	27	0.5	0.35	0.2	8	above-ground	63.3
YN031	1	1	Arundo donax L.	100	2	1.5	1	50	above-ground	55.6
YN031	1	1	Arundo donax L.	100	2	1.5	1	50	Under-ground	45.1
YN031	2	1	Thysanolaena maxima (Roxb.) Kuntze	100	4	3.5	3	20	Under-ground	65.3
YN031	2	1	Thysanolaena maxima (Roxb.) Kuntze	100	4	3.5	3	20	above-ground	36.2
YN031	3	1	Thysanolaena maxima (Roxb.) Kuntze	95	3	2.25	1.5	20	above-ground	45
YN031	3	1	Thysanolaena maxima (Roxb.) Kuntze	95	3	2.25	1.5	20	Under-ground	40.6
YN032	1	1	Thysanolaena maxima (Roxb.) Kuntze	100	2	1.7	1.5	5	above-ground	37.6
YN032	1	1	Thysanolaena maxima (Roxb.) Kuntze	100	2	1.7	1.5	5	Under-ground	28.3
YN032	2	1	Eupatorium odoratum L.	100	1.7	1.5	1.2	2	above-ground	55.2
YN032	2	1	Eupatorium odoratum L.	100	1.7	1.5	1.2	2	Under-ground	50.9
YN032	3	1	Thysanolaena maxima (Roxb.) Kuntze	100	2.7	2	1.3	4	above-ground	30.4
YN032	3	1	Thysanolaena maxima (Roxb.) Kuntze	100	2.7	2	1.3	4	Under-ground	31.1
YN033	1	1	Ageratina adenophora（Spreng.）R.M. King et H.Rob.	100	1.5	1.4	1.3	15	above-ground	29.8
YN033	1	1	Ageratina adenophora（Spreng.）R.M. King et H.Rob.	100	1.5	1.4	1.3	15	Under-ground	46
YN033	2	1	Pteridium aquilinum (L.) Kuhn var. latiusculum (Desv.) Underw.ex Heller	50	1.3	1.2	1.1	10	Under-ground	51.3
YN033	2	1	Pteridium aquilinum (L.) Kuhn var. latiusculum (Desv.) Underw.ex Heller	50	1.3	1.2	1.1	10	above-ground	19.1
YN033	3	1	Pteridium aquilinum (L.) Kuhn var. latiusculum (Desv.) Underw.ex Heller	90	1.3	1.1	0.8	10	above-ground	50.8
YN033	3	1	Pteridium aquilinum (L.) Kuhn var. latiusculum (Desv.) Underw.ex Heller	90	1.3	1.1	0.8	10	Under-ground	60.9
YN034	1	1	Zingiber striolatum Diels	60	0.5	0.5	0.5	8	Under-ground	38.74
YN034	1	1	Zingiber striolatum Diels	60	0.5	0.5	0.5	8	above-ground	20.8
YN034	2	1	Capillipedium assimile (Steud.) A. Camus.	100	2	1.8	1.6	10	Under-ground	59.6
YN034	2	1	Capillipedium assimile (Steud.) A. Camus.	100	2	1.8	1.6	10	above-ground	59.7
YN034	3	1	Isachne albens	90	3	2.8	2.6	5	above-ground	57.1
YN034	3	1	Isachne albens	90	3	2.8	2.6	5	Under-ground	57.6
YN035	1	1	Eupatorium odoratum L.	70	3	2.7	2.4	2	above-ground	39.7
YN035	1	1	Eupatorium odoratum L.	70	3	2.7	2.4	2	Under-ground	45.8
YN035	2	1	Imperata cylindrica (L.) Beauv.	80	1.5	1.3	1.1	15	above-ground	56.4
YN035	2	1	Imperata cylindrica (L.) Beauv.	80	1.5	1.3	1.1	15	Under-ground	38.7
YN035	3	1	Imperata cylindrica (L.) Beauv.	100	1.7	1.6	1.5	31	Under-ground	152.6
YN035	3	1	Imperata cylindrica (L.) Beauv.	100	1.7	1.6	1.5	31	above-ground	52.2
YN036	1	1	Calamagrostis epigeios (L.) Roth	70	1.7	1.6	1.5	34	Under-ground	54.7
YN036	1	1	Calamagrostis epigeios (L.) Roth	70	1.7	1.6	1.5	34	above-ground	46.7
YN036	2	1	Neyraudia reynaudiana (Kunth) Keng ex Hitchc.	70	2.1	2	1.9	30	Under-ground	55.5
YN036	2	1	Neyraudia reynaudiana (Kunth) Keng ex Hitchc.	70	2.1	2	1.9	30	above-ground	50.9
YN036	3	1	Cymbopogon tortilis (Presl) A. Camus[Amthistiria tortilis Presl]	90	2.5	2.3	2.1	5	Under-ground	47.8
YN036	3	1	Cymbopogon tortilis (Presl) A. Camus[Amthistiria tortilis Presl]	90	2.5	2.3	2.1	5	above-ground	35.6
YN037	1	1	Eupatorium odoratum L.	90	2.5	2	1.5	34	Under-ground	52.7
YN037	1	1	Eupatorium odoratum L.	90	2.5	2	1.5	34	above-ground	41.7
YN037	2	1	Isachne albens	80	1.5	1.25	1	30	Under-ground	60.8
YN037	2	1	Isachne albens	80	1.5	1.25	1	30	above-ground	57.5
YN037	3	1	Cymbopogon tortilis (Presl) A. Camus[Amthistiria tortilis Presl]	90	2.5	2.25	2	2	Under-ground	43.1
YN037	3	1	Cymbopogon tortilis (Presl) A. Camus[Amthistiria tortilis Presl]	90	2.5	2.25	2	2	above-ground	34.5
YN038	1	1	Heteropogon contortus (Linn. ) Beauv.	70	0.4	0.3	0.2	15	Under-ground	78.9
YN038	1	1	Heteropogon contortus (Linn. ) Beauv.	70	0.4	0.3	0.2	15	above-ground	55.4
YN038	2	1	Herba Ecliptae Eclipta prostrala L	45	2.5	1.8	1	30	above-ground	62.1
YN038	2	1	Herba Ecliptae Eclipta prostrala L	45	2.5	1.8	1	30	Under-ground	48.7
YN038	3	1	Torilis scabra (Thunb.) DC.	45	0.25	0.2	0.15	2	Under-ground	41.9
YN038	3	1	Torilis scabra (Thunb.) DC.	45	0.25	0.2	0.15	2	above-ground	31.7
YN039	1	1	Scutellaria barbata D. Don	15	0.15	0.1	0.05	12	above-ground	41.5
YN039	1	1	Scutellaria barbata D. Don	15	0.15	0.1	0.05	12	Under-ground	67.6
YN039	2	1	Elsholtzia rugulosa Hemsl.	30	0.3	0.2	0.1	16	Under-ground	67.4
YN039	2	1	Elsholtzia rugulosa Hemsl.	30	0.3	0.2	0.1	16	above-ground	50
YN039	3	1	Leontopodium leontopodioides (Willd. ) Beauv.	10	0.35	0.25	0.15	7	Under-ground	46.7
YN039	3	1	Leontopodium leontopodioides (Willd. ) Beauv.	10	0.35	0.25	0.15	7	above-ground	35.5
YN040	1	1	Capillipedium parviflorum（R. Br）Stapf.	10	0.5	0.2	0.1	7	above-ground	65.8
YN040	1	1	Capillipedium parviflorum（R. Br）Stapf.	10	0.5	0.2	0.1	7	Under-ground	59
YN040	2	1	Capillipedium parviflorum（R. Br）Stapf.	9	0.4	0.25	0.15	6	Under-ground	84.4
YN040	2	1	Capillipedium parviflorum（R. Br）Stapf.	9	0.4	0.25	0.15	6	above-ground	67.7
YN040	3	1	Scutellaria barbata D. Don	10	0.6	0.3	0.1	7	Under-ground	57
YN040	3	1	Scutellaria barbata D. Don	10	0.6	0.3	0.1	7	above-ground	38.5
YN041	1	1	Elsholtzia bodinieri Vant.	50	12	7	3	21	Under-ground	66.4
YN041	1	1	Elsholtzia bodinieri Vant.	50	12	7	3	21	above-ground	44.9
YN041	2	1	Leontopodium leontopodioides (Willd. ) Beauv.	15	25	18	3	14	above-ground	47.5
YN041	2	1	Leontopodium leontopodioides (Willd. ) Beauv.	15	25	18	3	14	Under-ground	59.2
YN041	3	1	Leontopodium leontopodioides (Willd. ) Beauv.	18	28	17	2	26	Under-ground	52.5
YN041	3	1	Leontopodium leontopodioides (Willd. ) Beauv.	18	28	17	2	26	above-ground	26.4
YN042	1	1	紫柄假瘤Pteridium aquilinum (L.) Kuhn var. latiusculum (Desv.) Underw.ex Heller	32	35	26	12	22	Under-ground	43.6
YN042	1	1	紫柄假瘤Pteridium aquilinum (L.) Kuhn var. latiusculum (Desv.) Underw.ex Heller	32	35	26	12	22	above-ground	25.4
YN042	2	1	Gerbera piloselloides Cass.	32	10	7	3	17	above-ground	18.1
YN042	2	1	Gerbera piloselloides Cass.	32	10	7	3	17	Under-ground	40.9
YN042	3	1	Gerbera piloselloides Cass.	22	8	6	4	14	Under-ground	42.4
YN042	3	1	Gerbera piloselloides Cass.	22	8	6	4	14	above-ground	19.2
YN043	1	1	Ageratina adenophora（Spreng.）R.M. King et H.Rob.	50	76	42	8	28	Under-ground	60
YN043	1	1	Ageratina adenophora（Spreng.）R.M. King et H.Rob.	50	76	42	8	28	above-ground	39.9
YN043	2	1	Artemisia carvifolia Buch.-Ham. ex Roxb. Hort. Beng.	58	85	52	4	24	above-ground	33.8
YN043	2	1	Artemisia carvifolia Buch.-Ham. ex Roxb. Hort. Beng.	58	85	52	4	24	Under-ground	26.1
YN043	3	1	Imperata cylindrica (L.) Beauv.	36	56	33	10	30	above-ground	42.3
YN043	3	1	Imperata cylindrica (L.) Beauv.	36	56	33	10	30	Under-ground	29.1
YN044	1	1	Imperata cylindrica (L.) Beauv.	38	65	38	5	8	Under-ground	82.3
YN044	1	1	Imperata cylindrica (L.) Beauv.	38	65	38	5	8	above-ground	61.1
YN044	2	1	Ficus tikoua Bur.	70	18	12	3	12	Under-ground	40.1
YN044	2	1	Ficus tikoua Bur.	70	18	12	3	12	above-ground	39.9
YN044	3	1	Potentilla chinensis Ser.	45	21	15	8	6	Under-ground	46.2
YN044	3	1	Potentilla chinensis Ser.	45	21	15	8	6	above-ground	36
YN045	1	1	三出假瘤Pteridium aquilinum (L.) Kuhn var. latiusculum (Desv.) Underw.ex Heller	65	23	15	3	22	Under-ground	73.4
YN045	1	1	三出假瘤Pteridium aquilinum (L.) Kuhn var. latiusculum (Desv.) Underw.ex Heller	65	23	15	3	22	above-ground	40.2
YN045	2	1	Sedum stellariifolium	42	13	8	5	18	Under-ground	48.2
YN045	2	1	Sedum stellariifolium	42	13	8	5	18	above-ground	36.6
YN045	3	1	Potentilla chinensis Ser.	42	24	17	6	15	above-ground	57.9
YN045	3	1	Potentilla chinensis Ser.	42	24	17	6	15	Under-ground	46.8
YN046	1	1	Leontopodium leontopodioides (Willd. ) Beauv.	55	38	21	4	25	above-ground	52.5
YN046	1	1	Leontopodium leontopodioides (Willd. ) Beauv.	55	38	21	4	25	Under-ground	46.3
YN046	2	1	Potentilla chinensis Ser.	67	32	16	4	11	Under-ground	48.2
YN046	2	1	Potentilla chinensis Ser.	67	32	16	4	11	above-ground	54.9
YN046	3	1	Fragaria vesca L.	48	12	8	3	17	above-ground	52.1
YN046	3	1	Fragaria vesca L.	48	12	8	3	17	Under-ground	63.4
YN047	1	1	Potentilla chinensis Ser.	35	27	16	5	18	Under-ground	52.1
YN047	1	1	Potentilla chinensis Ser.	35	27	16	5	18	above-ground	57.6
YN047	2	1	Leontopodium leontopodioides (Willd. ) Beauv.	42	16	8	2	27	above-ground	66
YN047	2	1	Leontopodium leontopodioides (Willd. ) Beauv.	42	16	8	2	27	Under-ground	52.9
YN047	3	1	Fragaria vesca L.	52	11	6	2	31	Under-ground	65.3
YN047	3	1	Fragaria vesca L.	52	11	6	2	31	above-ground	48.6
YN048	1	1	Potentilla chinensis Ser.	37	15	8	3	23	Under-ground	46
YN048	1	1	Potentilla chinensis Ser.	37	15	8	3	23	above-ground	56.7
YN048	2	1	Potentilla chinensis Ser.	42	17	11	4	25	Under-ground	66.7
YN048	2	1	Potentilla chinensis Ser.	42	17	11	4	25	above-ground	50.8
YN048	3	1	Anaphalis nepalensis (Spreng.) Hand. -Mazz.	38	25	14	4	23	Under-ground	49.2
YN048	3	1	Anaphalis nepalensis (Spreng.) Hand. -Mazz.	38	25	14	4	23	above-ground	40.2
YN049	1	1	Petasites japonicus(Sieb. et Zucc.)F.Schmidt	62	35	22	6	12	Under-ground	49.4
YN049	1	1	Petasites japonicus(Sieb. et Zucc.)F.Schmidt	62	35	22	6	12	above-ground	22.9
YN049	2	1	Anemone rivularis Buch.-Ham. ex DC.	54	42	15	4	21	above-ground	35.2
YN049	2	1	Anemone rivularis Buch.-Ham. ex DC.	54	42	15	4	21	Under-ground	26.2
YN049	3	1	Leontopodium leontopodioides (Willd. ) Beauv.	62	25	14	5	24	above-ground	41.3
YN049	3	1	Leontopodium leontopodioides (Willd. ) Beauv.	62	25	14	5	24	Under-ground	51.2
YN050	1	1	SyringapersicaLinn.f.persica	45	23	14	5	18	Under-ground	52
YN050	1	1	SyringapersicaLinn.f.persica	45	23	14	5	18	above-ground	39.3
YN050	2	1	Gerbera piloselloides Cass.	37	28	15	3	22	above-ground	38.1
YN050	2	1	Gerbera piloselloides Cass.	37	28	15	3	22	Under-ground	57.9
YN050	3	1	Capillipedium assimile (Steud.) A. Camus.	52	32	17	4	11	Under-ground	80.2
YN050	3	1	Capillipedium assimile (Steud.) A. Camus.	52	32	17	4	11	above-ground	60.6
YN051	1	1	Artemisia carvifolia Buch.-Ham. ex Roxb. Hort. Beng.	65	58	33	5	16	above-ground	40.3
YN051	1	1	Artemisia carvifolia Buch.-Ham. ex Roxb. Hort. Beng.	65	58	33	5	16	Under-ground	65.7
YN051	2	1	Ficus tikoua Bur.	42	11	6	3	15	above-ground	39.9
YN051	2	1	Ficus tikoua Bur.	42	11	6	3	15	Under-ground	51.2
YN051	3	1	Pteridium aquilinum (L.) Kuhn var. latiusculum (Desv.) Underw.ex Heller	60	80	52	16	8	above-ground	47.6
YN051	3	1	Pteridium aquilinum (L.) Kuhn var. latiusculum (Desv.) Underw.ex Heller	60	80	52	16	8	Under-ground	67.6
YN052	1	1	Pteridium aquilinum (L.) Kuhn var. latiusculum (Desv.) Underw.ex Heller	38	76	42	8	12	above-ground	57.1
YN052	1	1	Pteridium aquilinum (L.) Kuhn var. latiusculum (Desv.) Underw.ex Heller	38	76	42	8	12	Under-ground	51
YN052	2	1	SyringapersicaLinn.f.persica	48	16	9	3	26	Under-ground	69.3
YN052	2	1	SyringapersicaLinn.f.persica	48	16	9	3	26	above-ground	45.7
YN052	3	1	Artemisia carvifolia Buch.-Ham. ex Roxb. Hort. Beng.	39	32	18	5	22	Under-ground	68.1
YN052	3	1	Artemisia carvifolia Buch.-Ham. ex Roxb. Hort. Beng.	39	32	18	5	22	above-ground	39.6
YN053	1	1	Iris tectorum Maxim.	68	42	28	6	13	above-ground	28.4
YN053	1	1	Iris tectorum Maxim.	68	42	28	6	13	Under-ground	33.5
YN053	2	1	Rubus alceaefolius Poir.	75	52	34	8	5	above-ground	31.6
YN053	2	1	Rubus alceaefolius Poir.	75	52	34	8	5	Under-ground	41.7
YN053	3	1	Pteridium aquilinum (L.) Kuhn var. latiusculum (Desv.) Underw.ex Heller	82	120	65	8	11	Under-ground	27.2
YN053	3	1	Pteridium aquilinum (L.) Kuhn var. latiusculum (Desv.) Underw.ex Heller	82	120	65	8	11	above-ground	23.5
YN054	1	1	Iris tectorum Maxim.	68	56	38	9	16	above-ground	50.2
YN054	1	1	Iris tectorum Maxim.	68	56	38	9	16	Under-ground	51.4
YN054	2	1	Perilla frutescens	54	30	22	6	21	above-ground	31.2
YN054	2	1	Perilla frutescens	54	30	22	6	21	Under-ground	47.8
YN054	3	1	Gonostegia hirta (Bl.) Miq.	60	46	24	5	18	Under-ground	36
YN054	3	1	Gonostegia hirta (Bl.) Miq.	60	46	24	5	18	above-ground	25.6
YN055	1	1	Pteridium aquilinum (L.) Kuhn var. latiusculum (Desv.) Underw.ex Heller	72	105	72	25	2	above-ground	30.3
YN055	1	1	Pteridium aquilinum (L.) Kuhn var. latiusculum (Desv.) Underw.ex Heller	72	105	72	25	2	Under-ground	27.4
YN055	2	1	Osmunda japonica Thunb.	88	95	66	8	3	Under-ground	64
YN055	2	1	Osmunda japonica Thunb.	88	95	66	8	3	above-ground	37.6
YN055	3	1	Iris tectorum Maxim.	56	64	35	12	7	above-ground	33.8
YN055	3	1	Iris tectorum Maxim.	56	64	35	12	7	Under-ground	15.9
YN056	1	1	Conyza japonica(Thunb．)Less．	74	220	160	5	17	above-ground	36.5
YN056	1	1	Conyza japonica(Thunb．)Less．	74	220	160	5	17	Under-ground	57.1
YN056	2	1	Plantago depressa Willd.	68	15	8	3	24	above-ground	28.3
YN056	2	1	Plantago depressa Willd.	68	15	8	3	24	Under-ground	50
YN056	3	1	Gonostegia hirta (Bl.) Miq.	46	25	12	2	15	Under-ground	41.3
YN056	3	1	Gonostegia hirta (Bl.) Miq.	46	25	12	2	15	above-ground	20.1
YN057	1	1	Ficus tikoua Bur.	85	24	15	4	8	above-ground	39.4
YN057	1	1	Ficus tikoua Bur.	85	24	15	4	8	Under-ground	47.5
YN057	2	1	Bidensalba(L.) DC.	56	45	26	8	12	Under-ground	87.7
YN057	2	1	Bidensalba(L.) DC.	56	45	26	8	12	above-ground	24.6
YN057	3	1	Eleusine indica (L.) Gaertn.	65	58	34	3	24	Under-ground	84.5
YN057	3	1	Eleusine indica (L.) Gaertn.	65	58	34	3	24	above-ground	41
YN058	1	1	Anaphalis nepalensis (Spreng.) Hand. -Mazz.	52	38	21	4	32	Under-ground	53.4
YN058	1	1	Anaphalis nepalensis (Spreng.) Hand. -Mazz.	52	38	21	4	32	above-ground	47.6
YN058	2	1	Potentilla chinensis Ser.	45	26	16	4	18	Under-ground	54.8
YN058	2	1	Potentilla chinensis Ser.	45	26	16	4	18	above-ground	43.2
YN058	3	1	Filipendula Palmata	54	48	28	5	11	Under-ground	67.8
YN058	3	1	Filipendula Palmata	54	48	28	5	11	above-ground	45
YN058	3	1	Fragaria vesca L.	65	12	6	2	27	above-ground	43.3
YN058	3	1	Fragaria vesca L.	65	12	6	2	27	Under-ground	60.4
YN059	1	1	Leontopodium leontopodioides (Willd. ) Beauv.	48	42	28	4	25	above-ground	56.4
YN059	1	1	Leontopodium leontopodioides (Willd. ) Beauv.	48	42	28	4	25	Under-ground	45.3
YN059	2	1	Anaphalis nepalensis (Spreng.) Hand. -Mazz.	45	51	32	3	22	above-ground	40
YN059	2	1	Anaphalis nepalensis (Spreng.) Hand. -Mazz.	45	51	32	3	22	Under-ground	43.4
YN059	3	1	Pteridium aquilinum (L.) Kuhn var. latiusculum (Desv.) Underw.ex Heller	68	52	36	8	6	Under-ground	57.8
YN059	3	1	Pteridium aquilinum (L.) Kuhn var. latiusculum (Desv.) Underw.ex Heller	68	52	36	8	6	above-ground	54.2
YN059	3	1	Imperata cylindrica (L.) Beauv.	56	64	44	5	2	Under-ground	54.6
YN059	3	1	Imperata cylindrica (L.) Beauv.	56	64	44	5	2	above-ground	53.5
YN060	1	1	Ainsliaea bonatii Beauverd	62	26	14	5	15	Under-ground	32.4
YN060	1	1	Ainsliaea bonatii Beauverd	62	26	14	5	15	above-ground	13.2
YN060	2	1	Polygonatum sibiricum Delar. ex Redoute	46	65	43	21	15	above-ground	25.4
YN060	2	1	Polygonatum sibiricum Delar. ex Redoute	46	65	43	21	15	Under-ground	21.3
YN060	2	1	紫柄假瘤Pteridium aquilinum (L.) Kuhn var. latiusculum (Desv.) Underw.ex Heller	54	16	10	4	38	Under-ground	58.2
YN060	2	1	紫柄假瘤Pteridium aquilinum (L.) Kuhn var. latiusculum (Desv.) Underw.ex Heller	54	16	10	4	38	above-ground	20.5
YN060	3	1	Elsholtzia rugulosa Hemsl.	42	62	44	18	5	Under-ground	53.7
YN060	3	1	Elsholtzia rugulosa Hemsl.	42	62	44	18	5	above-ground	44.5
YN061	1	1	Pteridium aquilinum (L.) Kuhn var. latiusculum (Desv.) Underw.ex Heller	78	82	64	22	6	above-ground	35.3
YN061	1	1	Pteridium aquilinum (L.) Kuhn var. latiusculum (Desv.) Underw.ex Heller	78	82	64	22	6	Under-ground	44.4
YN061	1	1	Artemisia carvifolia Buch.-Ham. ex Roxb. Hort. Beng.	86	125	75	12	14	Under-ground	37.9
YN061	1	1	Artemisia carvifolia Buch.-Ham. ex Roxb. Hort. Beng.	86	125	75	12	14	above-ground	38
YN061	2	1	Ficus tikoua Bur.	52	10	5	1	15	Under-ground	39.2
YN061	2	1	Ficus tikoua Bur.	52	10	5	1	15	above-ground	27.8
YN061	3	1	Cirsium japonicum Fisch. ex DC.	65	35	29	12	3	above-ground	20.2
YN061	3	1	Cirsium japonicum Fisch. ex DC.	65	35	29	12	3	Under-ground	27.3
YN062	1	1	Pteridium aquilinum (L.) Kuhn var. latiusculum (Desv.) Underw.ex Heller	64	172	115	22	7	above-ground	44
YN062	1	1	Pteridium aquilinum (L.) Kuhn var. latiusculum (Desv.) Underw.ex Heller	64	172	115	22	7	Under-ground	35.7
YN062	2	1	Miscanthus floridulus (Lab.) Warb. ex Schum. et Laut.	75	165	122	10	5	above-ground	57.4
YN062	2	1	Miscanthus floridulus (Lab.) Warb. ex Schum. et Laut.	75	165	122	10	5	Under-ground	46.3
YN062	2	1	Elsholtzia rugulosa Hemsl.	55	94	68	8	9	Under-ground	52.3
YN062	2	1	Elsholtzia rugulosa Hemsl.	55	94	68	8	9	above-ground	41.3
YN062	3	1	Capillipedium assimile (Steud.) A. Camus.	60	24	15	4	11	Under-ground	79.6
YN062	3	1	Capillipedium assimile (Steud.) A. Camus.	60	24	15	4	11	above-ground	96.7
YN063	1	1	Artemisia carvifolia Buch.-Ham. ex Roxb. Hort. Beng.	62	105	68	5	16	above-ground	46.3
YN063	1	1	Artemisia carvifolia Buch.-Ham. ex Roxb. Hort. Beng.	62	105	68	5	16	Under-ground	64.7
YN063	1	1	Ageratina adenophora（Spreng.）R.M. King et H.Rob.	75	128	85	8	28	above-ground	37.5
YN063	1	1	Ageratina adenophora（Spreng.）R.M. King et H.Rob.	75	128	85	8	28	Under-ground	62.2
YN063	2	1	Ficus tikoua Bur.	55	15	8	4	7	Under-ground	53.1
YN063	2	1	Ficus tikoua Bur.	55	15	8	4	7	above-ground	39.4
YN063	3	1	Bidensalba(L.) DC.	48	34	18	4	25	Under-ground	49.4
YN063	3	1	Bidensalba(L.) DC.	48	34	18	4	25	above-ground	11
YN064	1	1	Artemisia carvifolia Buch.-Ham. ex Roxb. Hort. Beng.	54	94	62	6	18	above-ground	59.7
YN064	1	1	Artemisia carvifolia Buch.-Ham. ex Roxb. Hort. Beng.	54	94	62	6	18	Under-ground	76.5
YN064	1	1	Ageratina adenophora（Spreng.）R.M. King et H.Rob.	65	135	86	5	23	above-ground	41.4
YN064	1	1	Ageratina adenophora（Spreng.）R.M. King et H.Rob.	65	135	86	5	23	Under-ground	58.7
YN064	2	1	Ageratina adenophora（Spreng.）R.M. King et H.Rob.	72	156	95	9	26	above-ground	35.9
YN064	2	1	Ageratina adenophora（Spreng.）R.M. King et H.Rob.	72	156	95	9	26	Under-ground	51.2
YN064	3	1	Ficus tikoua Bur.	46	16	9	3	12	Under-ground	52.4
YN064	3	1	Ficus tikoua Bur.	46	16	9	3	12	above-ground	34.3
YN065	1	1	Bidens pilosa L.	68	125	79	8	25	Under-ground	40.6
YN065	1	1	Bidens pilosa L.	68	125	79	8	25	above-ground	23
YN065	1	1	Arundo donax	55	215	125	64	8	Under-ground	60.5
YN065	1	1	Arundo donax	55	215	125	64	8	above-ground	44.4
YN065	2	1	Conyza japonica(Thunb．)Less．	62	116	78	12	11	Under-ground	57.2
YN065	2	1	Conyza japonica(Thunb．)Less．	62	116	78	12	11	above-ground	37.3
YN065	3	1	Sida acuta Burm. f.	47	55	35	6	16	above-ground	50.7
YN065	3	1	Sida acuta Burm. f.	47	55	35	6	16	Under-ground	63.4
YN066	1	1	Imperata cylindrica (L.) Beauv.	78	65	44	6	16	Under-ground	104.5
YN066	1	1	Imperata cylindrica (L.) Beauv.	78	65	44	6	16	above-ground	85.6
YN066	2	1	Miscanthus floridulus (Lab.) Warb. ex Schum. et Laut.	66	105	62	15	12	above-ground	66
YN066	2	1	Miscanthus floridulus (Lab.) Warb. ex Schum. et Laut.	66	105	62	15	12	Under-ground	52.7
YN066	2	1	Melastoma candidum D. Don	52	48	28	11	9	Under-ground	56
YN066	2	1	Melastoma candidum D. Don	52	48	28	11	9	above-ground	55.3
YN066	3	1	Conyza japonica(Thunb．)Less．	49	168	83	15	22	above-ground	54.7
YN066	3	1	Conyza japonica(Thunb．)Less．	49	168	83	15	22	Under-ground	59.6
YN067	1	1	Miscanthus floridulus (Lab.) Warb. ex Schum. et Laut.	55	110	72	15	15	Under-ground	73.7
YN067	1	1	Miscanthus floridulus (Lab.) Warb. ex Schum. et Laut.	55	110	72	15	15	above-ground	66.5
YN067	2	1	Ageratina adenophora（Spreng.）R.M. King et H.Rob.	48	132	88	1	17	Under-ground	55.4
YN067	2	1	Ageratina adenophora（Spreng.）R.M. King et H.Rob.	48	132	88	1	17	above-ground	31.7
YN067	3	1	Ageratina adenophora（Spreng.）R.M. King et H.Rob.	59	128	75	2	21	Under-ground	62.2
YN067	3	1	Ageratina adenophora（Spreng.）R.M. King et H.Rob.	59	128	75	2	21	above-ground	34.6
YN068	1	1	Leontopodium leontopodioides (Willd. ) Beauv.	55	62	38	4	32	Under-ground	52.8
YN068	1	1	Leontopodium leontopodioides (Willd. ) Beauv.	55	62	38	4	32	above-ground	48.7
YN068	1	1	Dicranopteris dichotoma (Thunb. ) Berhn.	64	57	36	6	22	Under-ground	70.3
YN068	1	1	Dicranopteris dichotoma (Thunb. ) Berhn.	64	57	36	6	22	above-ground	80.4
YN068	2	1	Anaphalis nepalensis (Spreng.) Hand. -Mazz.	48	54	33	7	21	above-ground	34.5
YN068	2	1	Anaphalis nepalensis (Spreng.) Hand. -Mazz.	48	54	33	7	21	Under-ground	54.3
YN068	3	1	Ageratina adenophora（Spreng.）R.M. King et H.Rob.	51	86	56	3	29	above-ground	44.6
YN068	3	1	Ageratina adenophora（Spreng.）R.M. King et H.Rob.	51	86	56	3	29	Under-ground	56.7
YN069	1	1	Artemisia carvifolia Buch.-Ham. ex Roxb. Hort. Beng.	70	135	81	12	22	above-ground	46.7
YN069	1	1	Artemisia carvifolia Buch.-Ham. ex Roxb. Hort. Beng.	70	135	81	12	22	Under-ground	52.3
YN069	1	1	Ageratina adenophora（Spreng.）R.M. King et H.Rob.	66	124	77	8	24	Under-ground	61.5
YN069	1	1	Ageratina adenophora（Spreng.）R.M. King et H.Rob.	66	124	77	8	24	above-ground	37.4
YN069	2	1	Ficus tikoua Bur.	48	14	8	4	4	above-ground	49.3
YN069	2	1	Ficus tikoua Bur.	48	14	8	4	4	Under-ground	51.5
YN069	3	1	Bidens pilosa L.	52	85	44	3	33	Under-ground	60.5
YN069	3	1	Bidens pilosa L.	52	85	44	3	33	above-ground	30.2
YN070	1	1	Ficus tikoua Bur.	57	12	7	3	6	Under-ground	55.3
YN070	1	1	Ficus tikoua Bur.	57	12	7	3	6	above-ground	46
YN070	1	1	Ageratina adenophora（Spreng.）R.M. King et H.Rob.	68	162	75	5	32	Under-ground	57.7
YN070	1	1	Ageratina adenophora（Spreng.）R.M. King et H.Rob.	68	162	75	5	32	above-ground	40.5
YN070	2	1	Bidens pilosa L.	52	44	25	3	28	Under-ground	71.1
YN070	2	1	Bidens pilosa L.	52	44	25	3	28	above-ground	24.9
YN070	3	1	Artemisia carvifolia Buch.-Ham. ex Roxb. Hort. Beng.	61	54	30	7	21	Under-ground	66.4
YN070	3	1	Artemisia carvifolia Buch.-Ham. ex Roxb. Hort. Beng.	61	54	30	7	21	above-ground	59.3
YN071	1	1	Dicranopteris dichotoma (Thunb. ) Berhn.	90	72	44	5	42	Under-ground	72.6
YN071	1	1	Dicranopteris dichotoma (Thunb. ) Berhn.	90	72	44	5	42	above-ground	59.2
YN071	1	1	Dicranopteris dichotoma (Thunb. ) Berhn.	85	75	50	4	35	above-ground	71.4
YN071	1	1	Dicranopteris dichotoma (Thunb. ) Berhn.	85	75	50	4	35	Under-ground	70.5
YN071	2	1	Leontopodium leontopodioides (Willd. ) Beauv.	42	35	24	4	28	Under-ground	67.6
YN071	2	1	Leontopodium leontopodioides (Willd. ) Beauv.	42	35	24	4	28	above-ground	53.3
YN071	3	1	Eupatorium japonicum Thunb. ex Murray	55	26	16	5	5	Under-ground	70.8
YN071	3	1	Eupatorium japonicum Thunb. ex Murray	55	26	16	5	5	above-ground	65.3
YN072	1	1	Stellera chamaejasme Linn.	40	26	16	5	17	Under-ground	42.4
YN072	1	1	Stellera chamaejasme Linn.	40	26	16	5	17	above-ground	27.3
YN072	2	1	Potentilla chinensis Ser.	32	14	8	4	12	above-ground	58.6
YN072	2	1	Potentilla chinensis Ser.	32	14	8	4	12	Under-ground	41.2
YN072	3	1	Imperata cylindrica (L.) Beauv.	55	42	32	5	7	Under-ground	81.7
YN072	3	1	Imperata cylindrica (L.) Beauv.	55	42	32	5	7	above-ground	71.5
YN073	1	1	Potentilla chinensis Ser.	35	15	8	3	13	Under-ground	59.4
YN073	1	1	Potentilla chinensis Ser.	35	15	8	3	13	above-ground	46.2
YN073	2	1	Stellera chamaejasme Linn.	40	18	10	4	15	above-ground	33.6
YN073	2	1	Stellera chamaejasme Linn.	40	18	10	4	15	Under-ground	44
YN073	3	1	Stellera chamaejasme Linn.	37	16	9	3	12	above-ground	40.6
YN073	3	1	Stellera chamaejasme Linn.	37	16	9	3	12	Under-ground	41.53
YN073	3	1	Imperata cylindrica (L.) Beauv.	52	39	28	4	7	Under-ground	68.6
YN073	3	1	Imperata cylindrica (L.) Beauv.	52	39	28	4	7	above-ground	80.7
YN074	1	1	Fragaria vesca L.	38	12	8	4	17	above-ground	30.3
YN074	1	1	Fragaria vesca L.	38	12	8	4	17	Under-ground	59.4
YN074	1	1	Polygonum viviparum L.	45	21	13	5	21	Under-ground	66.5
YN074	1	1	Polygonum viviparum L.	45	21	13	5	21	above-ground	29.3
YN074	2	1	Anaphalis nepalensis (Spreng.) Hand. -Mazz.	42	26	16	5	28	Under-ground	53.2
YN074	2	1	Anaphalis nepalensis (Spreng.) Hand. -Mazz.	42	26	16	5	28	above-ground	31.5
YN074	3	1	Stellera chamaejasme Linn.	40	19	14	6	25	Under-ground	52.6
YN074	3	1	Stellera chamaejasme Linn.	40	19	14	6	25	above-ground	32.4
YN075	1	1	Stellera chamaejasme Linn.	45	18	10	4	27	Under-ground	38.4
YN075	1	1	Stellera chamaejasme Linn.	45	18	10	4	27	above-ground	46.6
YN075	2	1	Stellera chamaejasme Linn.	32	21	12	3	19	Under-ground	50.3
YN075	2	1	Stellera chamaejasme Linn.	32	21	12	3	19	above-ground	31.4
YN075	2	1	Potentilla chinensis Ser.	38	15	8	3	21	Under-ground	52.7
YN075	2	1	Potentilla chinensis Ser.	38	15	8	3	21	above-ground	43.3
YN075	3	1	Fargesia spathacea Franch	56	25	16	5	7	above-ground	80.7
YN075	3	1	Fargesia spathacea Franch	56	25	16	5	7	Under-ground	84.3
YN076	1	1	Pteridium aquilinum (L.) Kuhn var. latiusculum (Desv.) Underw.ex Heller	45	88	61	26	6	above-ground	64.1
YN076	1	1	Pteridium aquilinum (L.) Kuhn var. latiusculum (Desv.) Underw.ex Heller	45	88	61	26	6	Under-ground	61.2
YN076	2	1	Gerbera piloselloides Cass.	39	13	7	3	15	Under-ground	66.3
YN076	2	1	Gerbera piloselloides Cass.	39	13	7	3	15	above-ground	29.8
YN076	3	1	Artemisia carvifolia Buch.-Ham. ex Roxb. Hort. Beng.	52	58	34	7	24	Under-ground	69.4
YN076	3	1	Artemisia carvifolia Buch.-Ham. ex Roxb. Hort. Beng.	52	58	34	7	24	above-ground	33.4
YN077	1	1	Imperata cylindrica (L.) Beauv.	44	38	25	5	27	above-ground	76.4
YN077	1	1	Imperata cylindrica (L.) Beauv.	44	38	25	5	27	Under-ground	81.7
YN077	2	1	Leontopodium leontopodioides (Willd. ) Beauv.	39	43	28	6	19	above-ground	62.3
YN077	2	1	Leontopodium leontopodioides (Willd. ) Beauv.	39	43	28	6	19	Under-ground	45.6
YN077	2	1	Miscanthus floridulus (Lab.) Warb. ex Schum. et Laut.	54	123	85	12	24	Under-ground	59.3
YN077	2	1	Miscanthus floridulus (Lab.) Warb. ex Schum. et Laut.	54	123	85	12	24	above-ground	62.7
YN077	3	1	Anaphalis nepalensis (Spreng.) Hand. -Mazz.	40	47	32	8	21	above-ground	47.7
YN077	3	1	Anaphalis nepalensis (Spreng.) Hand. -Mazz.	40	47	32	8	21	Under-ground	56.4
YN078	1	1	Artemisia carvifolia Buch.-Ham. ex Roxb. Hort. Beng.	45	115	76	9	21	Under-ground	55.6
YN078	1	1	Artemisia carvifolia Buch.-Ham. ex Roxb. Hort. Beng.	45	115	76	9	21	above-ground	41.5
YN078	1	1	Imperata cylindrica (L.) Beauv.	37	43	31	4	8	Under-ground	90.5
YN078	1	1	Imperata cylindrica (L.) Beauv.	37	43	31	4	8	above-ground	84.4
YN078	2	1	Potentilla chinensis Ser.	51	23	14	5	17	Under-ground	63.7
YN078	2	1	Potentilla chinensis Ser.	51	23	14	5	17	above-ground	47.6
YN078	3	1	Elsholtzia rugulosa Hemsl.	49	67	41	6	11	Under-ground	80.6
YN078	3	1	Elsholtzia rugulosa Hemsl.	49	67	41	6	11	above-ground	57.7
YN079	1	1	Anaphalis nepalensis (Spreng.) Hand. -Mazz.	43	38	27	11	22	Under-ground	54.4
YN079	1	1	Anaphalis nepalensis (Spreng.) Hand. -Mazz.	43	38	27	11	22	above-ground	40.3
YN079	2	1	Potentilla chinensis Ser.	39	25	18	5	13	Under-ground	58.7
YN079	2	1	Potentilla chinensis Ser.	39	25	18	5	13	above-ground	57.8
YN079	3	1	Pteridium aquilinum (L.) Kuhn var. latiusculum (Desv.) Underw.ex Heller	47	56	41	25	7	Under-ground	66.1
YN079	3	1	Pteridium aquilinum (L.) Kuhn var. latiusculum (Desv.) Underw.ex Heller	47	56	41	25	7	above-ground	45.1
YN080	1	1	凤尾Pteridium aquilinum (L.) Kuhn var. latiusculum (Desv.) Underw.ex Heller	75	66	42	5	36	above-ground	31.1
YN080	1	1	凤尾Pteridium aquilinum (L.) Kuhn var. latiusculum (Desv.) Underw.ex Heller	75	66	42	5	36	Under-ground	43.7
YN080	2	1	Rumex nepalensis Spreng.	37	58	35	9	11	Under-ground	59.3
YN080	2	1	Rumex nepalensis Spreng.	37	58	35	9	11	above-ground	33.5
YN080	2	1	Potentilla chinensis Ser.	45	35	24	6	14	above-ground	46.6
YN080	2	1	Potentilla chinensis Ser.	45	35	24	6	14	Under-ground	49.8
YN080	3	1	Pteridium aquilinum (L.) Kuhn var. latiusculum (Desv.) Underw.ex Heller	52	71	49	7	9	Under-ground	56
YN080	3	1	Pteridium aquilinum (L.) Kuhn var. latiusculum (Desv.) Underw.ex Heller	52	71	49	7	9	above-ground	32.2
YN081	1	1	Artemisia carvifolia Buch.-Ham. ex Roxb. Hort. Beng.	65	58	37	5	32	above-ground	45.7
YN081	1	1	Artemisia carvifolia Buch.-Ham. ex Roxb. Hort. Beng.	65	58	37	5	32	Under-ground	64.4
YN081	1	1	Miscanthus floridulus (Lab.) Warb. ex Schum. et Laut.	70	172	88	18	1	Under-ground	58.6
YN081	1	1	Miscanthus floridulus (Lab.) Warb. ex Schum. et Laut.	70	172	88	18	1	above-ground	52.1
YN081	2	1	Ageratina adenophora（Spreng.）R.M. King et H.Rob.	54	92	64	15	28	Under-ground	63
YN081	2	1	Ageratina adenophora（Spreng.）R.M. King et H.Rob.	54	92	64	15	28	above-ground	44.7
YN081	3	1	Elsholtzia rugulosa Hemsl.	66	45	29	7	15	above-ground	53.3
YN081	3	1	Elsholtzia rugulosa Hemsl.	66	45	29	7	15	Under-ground	50.7
YN082	1	1	Artemisia carvifolia Buch.-Ham. ex Roxb. Hort. Beng.	58	82	56	9	16	Under-ground	64.3
YN082	1	1	Artemisia carvifolia Buch.-Ham. ex Roxb. Hort. Beng.	58	82	56	9	16	above-ground	44
YN082	2	1	Cibotium barometz (L.) J. Sm.	53	44	36	16	2	above-ground	46.1
YN082	2	1	Cibotium barometz (L.) J. Sm.	53	44	36	16	2	Under-ground	42.2
YN082	2	1	Pteridium aquilinum (L.) Kuhn var. latiusculum (Desv.) Underw.ex Heller	65	112	75	12	11	above-ground	53.8
YN082	2	1	Pteridium aquilinum (L.) Kuhn var. latiusculum (Desv.) Underw.ex Heller	65	112	75	12	11	Under-ground	52
YN082	3	1	凤尾Pteridium aquilinum (L.) Kuhn var. latiusculum (Desv.) Underw.ex Heller	60	45	28	6	18	Under-ground	68.2
YN082	3	1	凤尾Pteridium aquilinum (L.) Kuhn var. latiusculum (Desv.) Underw.ex Heller	60	45	28	6	18	above-ground	48.6

## Sheet: Litter layer biomass
Litter biomass
Sample code	plot number	harvest area	Sample dry weight
YN001	1	1	52.7
YN001	2	1	127.5
YN001	3	1	159.5
YN002	1	1	83.6
YN002	2	1	165.7
YN002	3	1	77
YN003	1	1	56.9
YN003	2	1	36
YN003	3	1	49.3
YN004	1	1	51.3
YN004	2	1	64.6
YN004	3	1	75.4
YN005	1	1	95.1
YN005	2	1	117.3
YN005	3	1	107.4
YN006	1	1	98
YN006	2	1	85.9
YN006	3	1	96.6
YN007	1	1	132
YN007	2	1	92.7
YN007	3	1	105
YN008	1	1	112
YN008	2	1	111
YN008	3	1	113
YN009	1	1	100
YN009	2	1	125
YN009	3	1	118
YN010	1	1	58.9
YN010	2	1	67.2
YN010	3	1	69.3
YN011	1	1	66
YN011	2	1	100
YN011	3	1	105.1
YN012	1	1	49
YN012	2	1	65
YN012	3	1	96.4
YN013	1	1	93.5
YN013	2	1	83.7
YN013	3	1	71.2
YN014	1	1	116
YN014	2	1	95
YN014	3	1	94
YN015	1	1	98.9
YN015	2	1	120.8
YN015	3	1	107.8
YN016	1	1	74.1
YN016	2	1	67.2
YN016	3	1	57.9
YN017	1	1	89.2
YN017	2	1	90.8
YN017	3	1	68
YN018	1	1	87.6
YN018	2	1	118.1
YN018	3	1	96.6
YN019	1	1	89.2
YN019	2	1	102
YN019	3	1	104
YN020	1	1	105
YN020	2	1	89.1
YN020	3	1	117.5
YN021	1	1	90.8
YN021	2	1	88.4
YN021	3	1	93
YN022	1	1	94.9
YN022	2	1	117.8
YN022	3	1	105.4
YN023	1	1	118.9
YN023	2	1	119.2
YN023	3	1	109
YN024	1	1	111.7
YN024	2	1	79
YN024	3	1	109.3
YN025	1	1	97.5
YN025	2	1	103.7
YN025	3	1	125.4
YN026	1	1	100
YN026	2	1	120.2
YN026	3	1	86.7
YN027	1	1	112.7
YN027	2	1	118
YN027	3	1	88.3
YN028	1	1	110.5
YN028	2	1	121.5
YN028	3	1	114
YN029	1	1	96.6
YN029	2	1	92
YN029	3	1	96.1
YN030	1	1	73.9
YN030	2	1	77.8
YN030	3	1	72.2
YN031	1	1	41.2
YN031	2	1	43.4
YN031	3	1	39.1
YN032	1	1	57
YN032	2	1	50.6
YN032	3	1	60
YN033	1	1	56.3
YN033	2	1	59.8
YN033	3	1	66
YN034	1	1	48.1
YN034	2	1	62
YN034	3	1	50.4
YN035	1	1	48.4
YN035	2	1	53.9
YN035	3	1	26
YN036	1	1	85.2
YN036	2	1	85.9
YN036	3	1	88.4
YN037	1	1	71.7
YN037	2	1	83.7
YN037	3	1	83.5
YN038	1	1	85.7
YN038	2	1	80
YN038	3	1	89.6
YN039	1	1	71.8
YN039	2	1	74
YN039	3	1	76.1
YN040	1	1	81.4
YN040	2	1	81.3
YN040	3	1	75.6
YN041	1	1	125.3
YN041	2	1	73.6
YN041	3	1	89
YN042	1	1	43.2
YN042	2	1	54.3
YN042	3	1	41.5
YN043	1	1	77.3
YN043	2	1	84.9
YN043	3	1	101
YN044	1	1	57.2
YN044	2	1	57.4
YN044	3	1	61.3
YN045	1	1	63.6
YN045	2	1	90.8
YN045	3	1	74.2
YN046	1	1	64.7
YN046	2	1	63.6
YN046	3	1	70.4
YN047	1	1	84.3
YN047	2	1	76.1
YN047	3	1	57.6
YN048	1	1	73.7
YN048	2	1	83.2
YN048	3	1	82.9
YN049	1	1	65.1
YN049	2	1	51.3
YN049	3	1	49.1
YN050	1	1	92.1
YN050	2	1	97.6
YN050	3	1	78.4
YN051	1	1	78.1
YN051	2	1	66.7
YN051	3	1	76.3
YN052	1	1	66.8
YN052	2	1	71.6
YN052	3	1	78.1
YN053	1	1	68.8
YN053	2	1	50.1
YN053	3	1	47.4
YN054	1	1	45.3
YN054	2	1	69.4
YN054	3	1	108
YN055	1	1	40.7
YN055	2	1	48.6
YN055	3	1	46.5
YN056	1	1	63.1
YN056	2	1	73.4
YN056	3	1	30
YN057	1	1	107.2
YN057	2	1	113.4
YN057	3	1	117.5
YN058	1	1	101.2
YN058	2	1	79.6
YN058	3	1	74.4
YN059	1	1	86
YN059	2	1	80.4
YN059	3	1	76.3
YN060	1	1	38.7
YN060	2	1	40
YN060	3	1	45.3
YN061	1	1	57.4
YN061	2	1	63.5
YN061	3	1	69.3
YN062	1	1	62
YN062	2	1	49.1
YN062	3	1	70.8
YN063	1	1	68.3
YN063	2	1	71.4
YN063	3	1	69.5
YN064	1	1	79.1
YN064	2	1	71
YN064	3	1	71.4
YN065	1	1	130.4
YN065	2	1	125.2
YN065	3	1	136.7
YN066	1	1	144.4
YN066	2	1	139.3
YN066	3	1	141.1
YN067	1	1	130.8
YN067	2	1	84.3
YN067	3	1	85.4
YN068	1	1	85.6
YN068	2	1	74.5
YN068	3	1	72.7
YN069	1	1	92.8
YN069	2	1	113.7
YN069	3	1	101.2
YN070	1	1	111.4
YN070	2	1	109.7
YN070	3	1	127.4
YN071	1	1	76.3
YN071	2	1	75.2
YN071	3	1	79
YN072	1	1	56.4
YN072	2	1	46.7
YN072	3	1	58.6
YN073	1	1	104
YN073	2	1	117.8
YN073	3	1	141.6
YN074	1	1	42.2
YN074	2	1	46.7
YN074	3	1	47.4
YN075	1	1	141.7
YN075	2	1	60.4
YN075	3	1	84.5
YN076	1	1	56.4
YN076	2	1	69.3
YN076	3	1	90
YN077	1	1	111.2
YN077	2	1	122.4
YN077	3	1	109
YN078	1	1	90.2
YN078	2	1	92.7
YN078	3	1	127.5
YN079	1	1	92.3
YN079	2	1	96.7
YN079	3	1	97.6
YN080	1	1	79.1
YN080	2	1	73.2
YN080	3	1	77.6
YN081	1	1	86.6
YN081	2	1	82.7
YN081	3	1	124.3
YN082	1	1	42.9
YN082	2	1	52.9
YN082	3	1	48
