# Supplementary material for: Biomass distribution pattern and stoichiometric characteristics in main shrub ecosystems in Central Yunnan, China
Source: PeerJ. 2022 Feb 28;10:e13005. doi: 10.7717/peerj.13005 (PMC8893025; doi:10.7717/peerj.13005)
Supplement: Supplemental Information 3 [file peerj-10-13005-s003.xlsx]

## Sheet: Sheet1
sample No.	Soil layer	Mean Carbon content	Mean Nitrogen content	Mean Phosphorus content	Soil layer	Mean Carbon content	Mean Nitrogen content	Mean Phosphorus content
YN001	0-10	1.39125	0.163371	0.357418	10~20	0.822642	0.114034	0.378984
YN002	0-10	0.879955	0.0686686	0.194777	10~20	0.566237	0.0545413	0.218533
YN005	0-10	0.212187	0.0333073	0.17094	10~20	0.701035	0.066286	0.192388
YN009	0-10	1.04731	0.107644	0.196872	10~20	0.537717	0.0728454	0.200948
YN011	0-10	1.46008	0.0987472	0.214033	10~20	0.631875	0.0605924	0.17359
YN012	0-10	4.29478	0.247853	0.57962	10~20	1.81544	0.144649	0.525728
YN015	0-10	0.912478	0.111486	0.437526	10~20	0.708128	0.0988174	0.449046
YN016	0-10	2.70047	0.126784	0.259374	10~20	1.53382	0.0884962	0.267687
YN018	0-10	1.03532	0.0858454	0.238472	10~20	0.56996	0.0682386	0.271315
YN022	0-10	1.23371	0.0877479	0.160424	10~20	0.605368	0.057205	0.149857
YN023	0-10	0.514392	0.0831543	0.364194	10~20	0.305242	0.068715	0.346666
YN026	0-10	3.56023	0.285016	1.33085	10~20	1.91528	0.166139	1.20029
YN039	0-10	1.60964	0.0807295	0.159834	10~20	1.2215	0.0623612	0.137443
YN041	0-10	2.43844	0.179581	0.575651	10~20	1.11237	0.105006	0.557168
YN042	0-10	2.25956	0.189384	1.75678	10~20	1.18151	0.113411	1.70326
YN043	0-10	1.06695	0.0985146	2.34871	10~20	0.842929	0.0849452	2.69923
YN048	0-10	17.4498	1.18649	2.80766	10~20	16.3432	1.11467	2.82975
YN049	0-10	12.3568	0.899411	1.83044	10~20	9.97087	0.714753	1.54608
YN051	0-10	1.3704	0.121749	0.48741	10~20	0.933859	0.0934566	0.442858
YN059	0-10	3.67026	0.226121	1.19086	10~20	1.30229	0.117564	1.16474
YN061	0-10	4.19239	0.328487	0.809764	10~20	2.14889	0.185884	0.697247
YN070	0-10	5.19481	0.39952	3.32122	10~20	4.95686	0.268549	2.5676
YN071	0-10	0.927229	0.0667887	0.162701	10~20	1.24506	0.118808	0.578164
	Mean	3.1208	0.229409	0.867632	Mean	2.25965	0.175651	0.839069
	±SD	3.93877	0.269905	0.911473	±SD	3.61158	0.240488	0.839062
sample No.	Soil layer	Mean Carbon content	Mean Nitrogen content	Mean Phosphorus content	Soil layer	Mean Carbon content	Mean Nitrogen content	Mean Phosphorus content
YN001	20-30	0.586577	0.093955	0.441659	30-50	0.652393	0.100374	0.446448
YN002	20-30	0.342723	0.0508942	0.285019	30-50	0.242288	0.0491795	0.25637
YN005	20-30	0.528966	0.0507906	0.204411	30-50	0.417945	0.0481152	0.177232
YN009	20-30	0.481894	0.06706	0.219192	30-50	0.319379	0.0600848	0.297465
YN011	20-30	0.395097	0.0558285	0.172394	30-50	0.194924	0.0500763	0.153263
YN012	20-30	0.831371	0.104013	0.439159	30-50	0.660122	0.100537	0.409952
YN015	20-30	0.643203	0.091449	0.472841	30-50	0.481188	0.0878324	0.42323
YN016	20-30	0.694751	0.0502405	0.236695	30-50	0.379805	0.0377441	0.254825
YN018	20-30	0.477956	0.0828437	0.367116	30-50	0.264086	0.0862256	0.469326
YN022	20-30	0.32573	0.0443903	0.145257	30-50	0.155216	0.031983	0.102594
YN023	20-30	0.335397	0.0668761	0.388416	30-50	0.35613	0.0675425	0.381279
YN026	20-30	1.31409	0.121305	1.22746	30-50	1.30191	0.121369	1.35983
YN039	20-30	0.896965	0.0473545	0.147559	30-50	0.497848	0.0340829	0.14488
YN041	20-30	0.874216	0.0848679	0.548362	30-50	0.36906	0.0583272	0.517364
YN042	20-30	1.03606	0.101292	1.66111	30-50	1.05202	0.106359	1.60791
YN043	20-30	0.530417	0.0623242	2.6254	30-50	0.438327	0.0546647	2.09779
YN048	20-30	16.4946	1.12537	2.83159	30-50
YN049	20-30	10.344	0.671974	1.7271	30-50	5.76796	0.360805	1.13925
YN051	20-30	0.602943	0.0729373	0.427142	30-50	0.327267	0.0514207	0.397069
YN059	20-30	0.893544	0.0937415	1.10143	30-50	0.565129	0.0823118	1.03771
YN061	20-30	1.38459	0.138802	0.662865	30-50	0.975317	0.113722	0.695011
YN070	20-30	5.49438	0.325874	2.8105	30-50
YN071	20-30	0.448075	0.0527511	0.195586	30-50	0.363805	0.0534009	0.215871
	Mean	1.99816	0.158997	0.840794	Mean	0.751529	0.0836265	0.599271
	±SD	3.77937	0.244401	0.864005	±SD	1.15733	0.0673689	0.527395
sample No.	Soil layer	Mean Carbon content	Mean Nitrogen content	Mean Phosphorus content	Soil layer	Mean Carbon content	Mean Nitrogen content	Mean Phosphorus content
YN011	50-70	0.160164	0.0478555	0.14991	70-100	0.116874	0.0468508	0.143414
YN012	50-70	0.554487	0.0951665	0.376964	70-100	0.540426	0.0907955	0.356818
YN015	50-70	0.418002	0.0794767	0.391829	70-100	0.441109	0.0825721	0.398741
YN022	50-70	0.169078	0.0379918	0.1172
YN026	50-70	1.28751	0.117743	1.60751	70-100	1.10967	0.106914	1.53565
YN041	50-70	0.293016	0.0616601	0.558227	70-100
YN042	50-70	0.867769	0.0930663	1.60911	70-100	0.900971	0.0927716	1.62326
YN043	50-70	0.323534	0.0458493	2.44167	70-100	0.286254	0.043254	2.68581
YN059	50-70	0.517987	0.0785656	1.08356
YN061	50-70	0.769484	0.098765	0.617326
	Mean	0.536104	0.075614	0.89533	Mean	0.565884	0.077193	1.12395
	±SD	0.335263	0.0250758	0.729215	±SD	0.342541	0.0238484	0.906834
Soil layer	Mean Carbon contentMeanAverage carbon contentration	Mean Nitrogen contentMeanAverage nitrogen contentration	Mean Phosphorus contentMeanAverage phosphorus contentration
0-10	3.1208	0.229409	0.867632
10-20	2.25965	0.175651	0.839069
20-30	1.99816	0.158997	0.840794
30-50	0.751529	0.0836265	0.599271
50-70	0.536104	0.075614	0.89533
70-100	0.565884	0.077193	1.12395
