# Supplementary material for: Biomass distribution pattern and stoichiometric characteristics in main shrub ecosystems in Central Yunnan, China
Source: PeerJ. 2022 Feb 28;10:e13005. doi: 10.7717/peerj.13005 (PMC8893025; doi:10.7717/peerj.13005)
Supplement: Supplemental Information 4 [file peerj-10-13005-s004.xlsx]

## Sheet: Element content
sample plot	Mean annual precipitation	Mean annual temperature	C（Root）	N（Root）	P（Root）	C（Stem)	N(Stem)	P(Stem)	C(Leaf)	N(Leaf)	P(Leaf)	C(Litter)	N(Litter)	P(Litter)	C(Soil)	N(Soil)	P(Soil)	C(Aboveground)	N(Aboveground)	P(Aboveground)	C(Underground)	N(Underground)	P(Underground)
YN001	768	16.2898	43.918	0.474839	0.510823	44.3107	0.415663	0.7548	45.5515	1.22204	1.09021	38.0541	1.05552	0.735921	1.39125	0.163371	0.357418	38.564	0.667079	0.754825	30.1577	0.589937	0.799511
YN002	807	14.292	47.407	0.379947	0.144459	47.2124	0.470828	0.170391	49.0613	1.25679	0.503074	41.7719	0.904572	0.298062	0.879955	0.0686686	0.194777	/	/	/	/	/	/
YN005	808	14.8529	45.0781	0.251227	0.316011	45.4912	0.29704	0.279891	46.9294	1.08366	0.831116	41.1833	0.563209	0.333739	0.212187	0.0333073	0.17094	42.2197	0.666971	0.542765	34.2564	0.359448	0.430013
YN009	712	18.4124	44.5212	0.279017	0.892112	43.7058	0.269358	0.820857	47.2623	1.0857	1.267	40.214	0.754402	0.660094	1.04731	0.107644	0.196872	40.4721	0.460752	0.596296	39.3978	0.461917	0.627273
YN011	785	14.0485	46.5196	0.370298	0.120071	46.518	0.395936	0.128871	49.4854	1.42446	0.548572	46.6509	0.748392	0.445999	1.46008	0.0987472	0.214033	42.4329	1.6724	1.63333	44.2822	0.561877	0.735892
YN012	818	12.9761	46.8299	0.265077	0.344466	47.2926	0.295713	0.40334	48.7192	1.034	0.908878	45.2727	0.926567	0.779364	4.29478	0.247853	0.57962	37.48	1.62713	3.67589	34.7255	0.670005	1.38813
YN015	741	17.2766	45.6315	0.270964	0.773559	45.4012	0.226797	0.573457	49.7684	1.71347	1.88825	38.3159	1.00412	0.642535	0.912478	0.111486	0.437526	40.9811	0.699342	1.14106	33.8587	0.487328	0.706809
YN016	793	15.029	47.011	0.355135	0.120162	47.0141	0.581277	0.247637	49.1776	1.27625	0.436757	44.2923	0.901596	0.381755	2.70047	0.126784	0.259374	43.1547	0.727171	0.596181	37.5162	0.387125	0.411031
YN018	835	13.3021	46.2992	0.452218	0.480976	46.1993	0.539389	0.564923	48.4807	1.44174	0.702212	43.9723	0.907195	0.552474	1.03532	0.0858454	0.238472	45.7745	0.768245	0.638462	25.8042	0.627202	1.37029
YN022	852	14.3936	47.0325	0.46796	0.263414	46.727	0.547156	0.339194	49.5639	1.64043	0.553326	47.6783	1.13466	0.405743	1.23371	0.0877479	0.160424	44.0795	1.25095	0.683961	41.5132	0.637985	0.382576
YN023	802	16.3184	45.1848	0.472486	0.706187	46.0563	0.499075	0.531604	48.4507	1.74368	0.963814	43.1088	0.791058	0.636742	0.514392	0.0831543	0.364194	43.4479	1.33223	2.07602	41.0395	0.468035	0.955533
YN026	903	15.0108	45.483	0.48996	0.905356	46.1659	0.513885	0.524139	48.1039	1.57705	0.917119	42.841	1.30373	1.39981	3.56023	0.285016	1.33085	42.9094	0.858487	0.729123	38.5348	0.97906	1.40677
YN039	887	14.0674	46.8162	0.358656	0.130652	46.7855	0.354598	0.135772	49.1008	1.29132	0.480174	47.0455	0.564007	0.300693	1.60964	0.0807295	0.159834	42.89	0.714153	0.626876	35.7359	0.491973	0.451498
YN041	924	14.1905	45.7692	0.52746	0.309848	45.6821	0.628978	0.325952	47.5976	1.76058	1.27492	44.5448	0.960631	0.791522	2.43844	0.179581	0.575651	39.5288	1.19179	1.34679	32.2092	0.564971	0.948806
YN042	892	14.5961	43.6427	0.443992	1.82145	44.9678	0.416841	0.902319	44.867	1.90311	1.53343	41.9067	1.25197	1.08176	2.25956	0.189384	1.75678	38.4483	1.45385	2.39733	30.8278	0.707036	1.45486
YN043	893	14.6304	46.0619	0.269298	0.441413	45.7722	0.267823	0.531249	46.3021	1.33901	1.72644	40.6769	1.00129	1.02457	1.06695	0.0985146	2.34871	36.5221	0.77751	2.43156	37.9746	0.424165	1.48854
YN048	950	9.10884	46.4951	0.414281	0.372605	47.5085	0.503681	0.496283	48.9188	1.45461	1.28662	39.2844	1.55604	1.60102	17.4498	1.18649	2.80766	42.0133	1.23059	1.4681	41.7247	1.30305	1.50735
YN049	940	9.55203	46.1428	0.296889	0.320134	46.7978	0.341951	0.285879	47.9245	1.33616	0.959641	42.3142	1.38335	1.2643	12.3568	0.899411	1.83044	39.6287	1.33929	2.56577	37.5837	0.810165	1.43418
YN051	874	14.2437	40.8666	0.755181	0.617203	43.0389	0.60767	0.523349	41.1674	2.24166	1.88366	32.6723	1.06732	0.883378	1.3704	0.121749	0.48741	35.5757	1.25353	1.44851	32.4733	0.533459	0.677926
YN059	1043	13.4631	46.7278	0.273004	0.313129	47.2451	0.416471	0.429236	49.2793	0.836347	0.728849	40.2025	0.924726	0.808739	3.67026	0.226121	1.19086	42.5192	1.16679	1.56298	35.6492	0.480532	0.950716
YN061	1086	13.1267	44.1534	0.464061	0.750306	44.7155	0.349524	0.678126	45.8999	1.97395	1.89552	39.9782	1.40345	1.03889	4.19239	0.328487	0.809764	39.8113	1.96367	2.32021	35.6965	0.937003	1.25755
YN070	1075	17.0246	44.5288	0.504945	1.17524	44.4268	0.486788	1.16344	43.6726	1.8528	3.76497	30.4425	1.30428	2.06753	5.19481	0.39952	3.32122	41.5942	1.30744	3.50725	38.0078	0.661655	2.15827
YN071	949	17.3317	45.7432	0.283752	0.258585	46.0164	0.397973	0.298079	47.647	1.22889	0.826979	38.3455	1.00064	0.555091	0.927229	0.0667887	0.162701	41.5852	0.654573	0.528107	38.4938	0.359327	0.354597

## Sheet:  Element ratio
sample plot	Mean annual precipitation	Mean annual temperature	C/N(Root)	C/P(Root)	N/P(Root)	C/N(Stem)	C/P(Stem)	N/P(Stem)	C/N(Leaf)	C/P(Leaf)	N/P(Leaf)	C/N(Aboveground)	C/P(Aboveground)	N/P(Aboveground)	C/N（Underground）	C/P（Underground）	N/P（Underground）	C/N(Soil)	C/P(Soil)	N/P(Soil)	C/N(Litter)	C/P(Litter)	N/P(Litter)
YN001	768	16.2898	92.4903	85.975	0.929557	106.603	58.7053	0.550693	37.2748	41.7823	1.12092	57.8102	51.09	0.883754	51.1201	37.7201	0.737872	8.51589	3.8925	0.300895	36.0526	51.7095	1.43428
YN002	807	14.292	124.773	328.169	2.63013	100.275	277.082	2.76321	39.0368	97.523	2.49823	/	/	/	/	/	/	12.8145	4.51776	0.24958	46.1786	140.145	3.03484
YN005	808	14.8529	179.431	142.647	0.794995	153.148	162.532	1.06127	43.3064	56.4656	1.30386	63.3007	77.7865	1.22884	95.303	79.6637	0.835899	6.37058	1.2413	0.344544	73.1226	123.4	1.68757
YN009	712	18.4124	159.565	49.9054	0.31276	162.259	53.2441	0.328143	43.5318	37.3025	0.856903	87.8392	67.8725	0.772691	85.292	62.8081	0.736389	9.72943	5.31976	0.362508	53.3059	60.9217	1.14287
YN011	785	14.0485	125.627	387.434	3.08399	117.489	360.966	3.07235	34.7397	90.2075	2.59667	25.3725	25.9793	1.02392	78.8112	60.1749	0.763532	14.7861	6.82175	0.349055	62.3348	104.599	1.67801
YN012	818	12.9761	176.666	135.949	0.769529	159.927	117.252	0.733161	47.1172	53.6037	1.13767	23.0344	10.1962	0.442649	51.8287	25.016	0.482668	17.3279	7.40964	0.27514	48.8606	58.0892	1.18888
YN015	741	17.2766	168.404	58.989	0.350282	200.185	79.1712	0.39549	29.0453	26.3569	0.907442	58.5995	35.9149	0.612887	69.4782	47.9036	0.689477	8.18466	2.08554	0.220061	38.1586	59.6323	1.56275
YN016	793	15.029	132.375	391.231	2.95547	80.8807	189.851	2.3473	38.5328	112.597	2.92211	59.3461	72.3854	1.21972	96.9096	91.2734	0.94184	21.2998	10.4115	0.330595	49.1266	116.023	2.36172
YN018	835	13.3021	102.383	96.261	0.940208	85.6511	81.7798	0.954801	33.6266	69.0399	2.05314	59.5832	71.6951	1.20328	41.1418	18.8312	0.457715	12.0603	4.34148	0.25151	48.4706	79.5917	1.64206
YN022	852	14.3936	100.505	178.55	1.77652	85.3999	137.759	1.61311	30.214	89.5746	2.96467	35.2367	64.4474	1.82898	65.0693	108.51	1.6676	14.0597	7.69031	0.38173	42.02	117.509	2.79649
YN023	802	16.3184	95.6321	63.9842	0.669066	92.2832	86.6364	0.93881	27.7865	50.2697	1.80914	32.613	20.9284	0.64172	87.6845	42.9493	0.489816	6.186	1.41241	0.198217	54.4951	67.7021	1.24235
YN026	903	15.0108	92.8301	50.2377	0.541179	89.8372	88.0796	0.980436	30.5025	52.4511	1.71957	49.9825	58.8507	1.17742	39.359	27.3923	0.695961	12.4913	2.67515	0.138415	32.8602	30.6049	0.931366
YN039	887	14.0674	130.532	358.328	2.74512	131.94	344.588	2.61171	38.0237	102.256	2.68928	60.0572	68.4187	1.13922	72.6379	79.1495	1.08965	19.9387	10.0707	0.453724	83.413	156.457	1.87569
YN041	924	14.1905	86.7728	147.715	1.70232	72.6292	140.15	1.92966	27.0351	37.3339	1.38094	33.1675	29.3503	0.884912	57.0103	33.9471	0.595455	13.5785	4.23597	0.188465	46.3704	56.2775	1.21365
YN042	892	14.5961	98.2962	23.9604	0.243758	107.877	49.8357	0.461966	23.5756	29.2592	1.24108	26.4459	16.0379	0.606444	43.6014	21.1895	0.485982	11.9311	1.2862	0.066585	33.4725	38.7394	1.15735
YN043	893	14.6304	171.044	104.351	0.610082	170.905	86.1597	0.504138	34.5792	26.8193	0.77559	46.9731	15.02	0.319758	89.5279	25.5113	0.284954	10.8304	0.45427	0.0314701	40.6244	39.7014	0.977281
YN048	950	9.10884	112.231	124.784	1.11185	94.3227	95.7286	1.01491	33.6302	38.0213	1.13057	34.1406	28.6174	0.838221	32.0207	27.6809	0.864467	14.7071	6.21508	0.39391	25.2464	24.5371	0.971904
YN049	940	9.55203	155.421	144.136	0.927389	136.855	163.698	1.19614	35.8674	49.94	1.39235	29.5894	15.4452	0.521982	46.3902	26.2057	0.564898	13.7388	6.75076	0.4623	30.5882	33.4685	1.09416
YN051	874	14.2437	54.1149	66.2125	1.22355	70.826	82.2374	1.16112	18.3647	21.8551	1.19006	28.3803	24.5602	0.865396	60.8731	47.901	0.786899	11.2559	2.81159	0.211031	30.6117	36.9857	1.20822
YN059	1043	13.4631	171.162	149.229	0.871858	113.442	110.068	0.970261	58.9221	67.6125	1.14749	36.4411	27.204	0.746518	74.1871	37.4973	0.505442	16.2314	3.08203	0.100936	43.4751	49.7101	1.14342
YN061	1086	13.1267	95.1456	58.8472	0.618496	127.933	65.9399	0.515426	23.2528	24.215	1.04138	20.2739	17.1584	0.846333	38.0965	28.3858	0.745103	12.7628	5.1773	0.266596	28.4856	38.4815	1.35091
YN070	1075	17.0246	88.1855	37.8891	0.429652	91.2653	38.1858	0.418405	23.5711	11.5997	0.492116	31.8135	11.8595	0.372781	57.4435	17.6103	0.306567	13.0026	1.56412	0.104591	23.3404	14.7241	0.63084
YN071	949	17.3317	161.208	176.899	1.09733	115.627	154.377	1.33513	38.7724	57.6157	1.486	63.5303	78.7439	1.23947	107.128	108.557	1.01334	13.883	5.69897	0.205492	38.3208	69.0797	1.80267
